1     **Inhibition of BET family proteins suppresses African swine**  
2                                     **fever virus infection**

3     Yaru Zhao<sup>1,#</sup>, Qingli Niu<sup>1,#\*</sup>, Saixia Yang<sup>1</sup>, Jifei Yang<sup>1</sup>, Zhonghui Zhang<sup>1</sup>, Shuxian  
4     Geng<sup>1</sup>, Jie Fan<sup>1</sup>, Zhijie Liu<sup>1</sup>, Guiquan Guan<sup>1</sup>, Zhiqing Liu<sup>3</sup>, Jia Zhou<sup>4</sup>, Haitao Hu<sup>5</sup>,  
5     Jianxun Luo<sup>1</sup>, Hong Yin<sup>1,2\*</sup>

6     <sup>1</sup>African Swine Fever Regional Laboratory, China (Lanzhou); State Key Laboratory of Veterinary  
7     Etiological Biology, Key Laboratory of Veterinary Parasitology of Gansu Province, Lanzhou  
8     Veterinary Research Institute, Chinese Academy of Agricultural Sciences, Xujiaping 1, Lanzhou,  
9     Gansu, 730046, P. R. China

10    <sup>2</sup>Jiangsu Co-Innovation Center for the Prevention and Control of Important Animal Infectious  
11    Disease and Zoonosis, Yangzhou University, Yangzhou 225009, P. R. China

12    <sup>3</sup>Institute of Evolution and Marine Biodiversity, Ocean University of China, Qingdao 266003,  
13    China

14    <sup>4</sup>Chemical Biology Program, Department of Pharmacology and Toxicology, University of Texas  
15    Medical Branch, Galveston, Texas 77555, USA.

16    <sup>5</sup>Department of Microbiology and Immunology, Institute for Human Infections and Immunity,  
17    University of Texas Medical Branch, Galveston, Texas, 77555, USA.

18    **E-mail addresses:**

19    Yaru Zhao, 1093974271@qq.com

20    Qingli Niu, niuqingli@caas.cn

21    Saixia Yang, 1689088939@qq.com

22    Jifei Yang, yangjifei@caas.cn

23    Zhonghui Zhang, zhangzhonghui@buaa.edu.cn

24    Shuxian Geng, 292852057@qq.com

25    Jie Fan, 1612024823@qq.com

26    Zhijie Liu, liuzhijie@caas.cn

27    Guiquan Guan, guanguiquan@caas.cn

28    Zhiqing Liu, liuzhiqing@ouc.edu.cn

29    Jia Zhou, [jjzhou@utmb.edu](mailto:jjzhou@utmb.edu)

30 Haitao Hu, haihu@utmb.edu

31 Jianxun Luo, luojianxun@caas.cn

32 Hong Yin, yinhong@caas.cn

33 \* **Corresponding authors:**

34 Qingli Niu, niuqingli@caas.cn; Hong Yin, yinhong@caas.cn

35 #Yaru Zhao and Qingli Niu contributed equally to this work.

36

### 37 **ABSTRACT**

38 African swine fever (ASF), an acute, severe, highly contagious disease caused  
39 by African swine fever virus (ASFV) infection in domestic pigs and boars, has a  
40 mortality rate of up to 100%. Because effective vaccines and treatments for ASF are  
41 lacking, effective control of the spread of ASF remains a great challenge for the pig  
42 industry. Host epigenetic regulation is essential for the viral gene transcription.  
43 Bromodomain and extraterminal (BET) family proteins, including BRD2, BRD3,  
44 BRD4, and BRDT, are epigenetic "readers" critical for gene transcription regulation.  
45 Among these proteins, BRD4 recognizes acetylated histones via its two  
46 bromodomains (BD1 and BD2) and recruits transcription factors, thereby playing a  
47 pivotal role in transcriptional regulation and chromatin remodeling during viral  
48 infection. However, how BET/BRD4 regulates ASFV replication and gene  
49 transcription is unknown. Here, we randomly selected 12 representative BET family  
50 inhibitors and compared their effects on ASFV infection in pig's primary alveolar  
51 macrophages (PAMs). They were found to inhibit viral infection by interfering with  
52 the different stages of viral life cycle (attachment, internalization, desencapsidation  
53 and formation of viral factories). The four most effective inhibitors (ARV-825,  
54 ZL0580, I-BET-762 and PLX51107) were selected for further antiviral activity  
55 analysis. These BET/BRD4 inhibitors dose-dependently decreased the ASFV titer,  
56 viral RNA transcription and protein production in PAMs. Collectively, our study  
57 reported novel activity of BET/BRD4 inhibitors in inducing suppression of ASFV

58 infection, providing insights into role of BET/BRD4 in epigenetic regulation of ASFV  
59 and potential new strategies for ASF prevention and control.

## 60 **IMPORTANCE**

61 Since the continuing spread of the ASFV in the world, and lack of commercial  
62 vaccines, the development of improved control strategies including antiviral drugs are  
63 urgently needed. BRD4 is an important epigenetic factor and has been commonly  
64 used for drug development for tumor treatment. Furthermore, the latest research  
65 showed that BET/BRD4 inhibition could suppress replication of virus. In this study,  
66 we first showed the inhibitory effect of agents targeting BET/BRD4 on ASFV  
67 infection with no significant host cytotoxicity. Then, we found 4 BET/BRD4  
68 inhibitors which can inhibit ASFV replication, RNA transcription and protein  
69 synthesis. Finally, we analyzed 4 inhibitors' biological effect on BRD4 according to  
70 the structure of BRD4, and docking analysis of BET-762, PLX51107, ARV-825 and  
71 ZL0580 binding to BD1 and BD2 domains of BRD4 was performed. Our findings  
72 support the hypothesis that BET/BRD4 can be considered as attractive host targets in  
73 antiviral drug discovery against ASFV.

74 **Keywords:** African swine fever virus, BET, BRD4, Inhibitors, Antiviral effect

75

## 76 **INTRODUCTION**

77 African swine fever (ASF), a highly contagious viral disease in swine infected  
78 with African swine fever virus (ASFV), exhibits a high mortality rate approaching 100%  
79 and has severe economic consequences for affected countries (1). ASF is clinically  
80 characterized by high fever, spotty skin, cyanosis, extensive bleeding of the internal  
81 organs, and disturbance of the respiratory and nervous systems (2). ASF was first  
82 introduced to Liaoning Province of China in August 2018, when genotype II ASFV  
83 resulted in numerous outbreaks within domestic pigs (<http://www.oie.int/>). These

84 outbreaks resulted in economic losses of several billion dollars to China's pig breeding  
85 industry and national economy, seriously affecting the lives of Chinese residents,  
86 national economic development and the pig industry (3).

87 The ASFV genome is large and complex, and the mechanism by which replication  
88 is regulated is unclear thus far. Although ASFV was discovered nearly a hundred years  
89 ago, no commercial vaccines or cost-effective antiviral drugs are available to  
90 effectively prevent ASF worldwide. ASFV, a tick-borne, double-stranded DNA virus  
91 and the only member of the *Asfarviridae* family, genus *Asfivirus*, mainly infects  
92 myeloid lineage cells, especially monocytes/macrophages and dendritic cells (4). The  
93 replication of ASFV primarily occurs in the cytoplasm, but a transient nucleation  
94 progress occurs at the early stage (5, 6). However, the nuclear replication mechanism is  
95 not clear. ASFV encodes more than 200 proteins, including at least 54 structural  
96 proteins and more than 100 nonstructural proteins, which are involved in replication of  
97 the genome and assembly of the virion, respectively, and also regulate host cell  
98 function and immune evasion (7). Following viral infection, the host cell transcriptional  
99 machinery is required for viral gene expression, indicating involvement of host  
100 epigenetic factors in this process (8).

101 Histone lysine acetylation is a key mechanism in chromatin processes and the  
102 regulation of gene transcription (9). BET family proteins include BRD2, BRD3, BRD4,  
103 and BRDT, which have important biological functions, such as their ability to mediate  
104 transcriptional regulation and chromatin remodeling (10). BRD4 recruits positive  
105 transcriptional elongation factor (P-TEFb) complex, which plays an essential role in  
106 transcriptional regulation by RNA polymerase II (RNA Pol II) in eukaryotes (11).  
107 BRD4 is one of the most important proteins in the BET family, and contains two  
108 bromo-domains (BD1 and BD2). BRD4 is not only a chromatin reader protein but also  
109 an epigenetic regulatory factor and transcription cofactor closely related to gene  
110 transcription, the cell cycle and apoptosis (12, 13). Abnormal BRD4 protein expression

111 can lead to the disordered expression of various genes and thus affects the function of  
112 related genes. BRD4 also plays an important role in DNA replication, transcription and  
113 repair (14). Among host molecules, BRD4 can be used by DNA viruses to regulate the  
114 transcription of viral genes during viral replication through critical protein-protein  
115 interactions. BRD4 and its inhibitors have been widely studied as potential antitumor  
116 therapies. The latest research showed that BRD4 inhibition activated the cGAS-STING  
117 pathway of the antiviral innate immune response by leading to DNA  
118 damage-dependent signaling and attenuated viral attachment of pseudorabies virus  
119 (PRV) (15). In addition, a BRD4 inhibitor was found to suppress human  
120 immunodeficiency virus (HIV) by inhibiting Tat transactivation and transcription  
121 elongation and by inducing a repressive chromatin structure at the HIV promoter (16).

122 However, potential effect of BET/BRD4 on ASFV replication and viral  
123 transcription has not been evaluated. ASFV may alter the epigenetic status of host  
124 chromatin to modulate cellular gene expression for its own benefit. Therefore, we  
125 focused on the biological effects of representative BET/BRD4 inhibitors on the  
126 replication and transcription of ASFV *in vitro*, and our results may open new avenues  
127 for the effective prevention and control of ASF.

## 128 **RESULTS**

### 129 **Cytotoxicity of BET inhibitors in PAMs**

130 The inhibitors were used at nine different concentrations ranging from 0.5  $\mu\text{M}$  to  
131 240  $\mu\text{M}$  to evaluate cytotoxicity by using the CCK-8 assay. The results indicated that  
132 at least 7 of the inhibitors did not cause a significant increase in cell death, and the  
133 cell viability reached more than 60% when the concentrations of the inhibitors were  
134 up to 20  $\mu\text{M}$ , but significant cytotoxic effects on the PAMs were observed at  
135 concentrations from 40  $\mu\text{M}$  to 240  $\mu\text{M}$ . Cell viability was still more than 50% when  
136 the inhibitors INCB054329 and CPI-203 were used at 80  $\mu\text{M}$ . The inhibitors

137 demonstrated potent cytotoxic effects on PAMs at 10  $\mu$ M (ARV-825 and AZD5153),  
138 20  $\mu$ M (PLX51107, PFI-1, RVX-208, ZL0580 and (+)-JQ1), 40  $\mu$ M (OTX051,  
139 MS436 and I-BET-762) and 80  $\mu$ M (INCB054329 and CPI-203) (Figure S2). The  
140 organic solvent DMSO had no cytotoxic effect on PAMs (data not shown). In  
141 summary, even though most of these BET inhibitors are commercially available as  
142 research tools, some of them show a certain degree of cytotoxicity against PAMs at  
143 high concentrations at which the primary cells are more sensitive to the inhibitors.

#### 144 **Effect of BET inhibitors on ASFV transcription in PAMs**

145 To determine whether the BET inhibitors could affect ASFV gene transcription  
146 by altering the functions of BET proteins, a time-of-addition assay was conducted to  
147 evaluate the effects of 12 BET/BRD4 inhibitors on specific step(s) of the ASFV life  
148 cycle. Cells were treated with the individual BET inhibitors at 5  $\mu$ M, and the  
149 functional role of BET in BET inhibitor-induced ASFV gene transcription was  
150 evaluated using real-time PCR. The relative expression levels of *CP204L* (early),  
151 *B646L* (late) and *GAPDH* in the cells treated with individual BET inhibitors were  
152 measured and compared with those in the control (DMSO; negative control [NC])  
153 group. Pretreatment with the BET inhibitors potently suppressed ASFV gene  
154 transcription in the cells (Figure 1A). A significant inhibitory effect on transcription  
155 of the *CP204L* gene, which is expressed early during the ASFV infection cycle, was  
156 observed when the inhibitors were applied simultaneously with ASFV infection, but  
157 the effect was less pronounced than that observed upon pretreatment (Figure 1B).  
158 Moreover, neither *CP204L* nor *B646L* gene transcription was inhibited by BET  
159 inhibitor post-treatment (Figure 1C). Interestingly, pretreatment with PLX51107 and  
160 ZL0580 almost completely inhibited ASFV gene transcription. Since accumulating  
161 evidence suggests that BET/BRD4 plays an important role in regulating viral  
162 transcriptional (17-19) and based on our above results, four representative inhibitors  
163 (PLX51107, I-BET762, ZL0580 and ARV-825) with the greatest inhibitory effects

164 under both pretreatment and cotreatment conditions were selected for further  
165 experiments. Among these four inhibitors, the first two (PLX51107 and I-BET762)  
166 are broad-spectrum BET family inhibitors, while the latter two (ZL0580 and  
167 ARV-825) are BRD4-specific inhibitors. Collectively, these results suggest that  
168 BET/BRD4 inhibition results in decreased ASFV gene transcription in ASFV  
169 infection, and the expression of ASFV *CP204L* and *B646L* upon inhibitor treatment  
170 significantly differed from that in untreated cells (DMSO-treated group) *in vitro*. Thus,  
171 further experiments were performed.

### 172 **PLX51107, I-BET762, ZL0580 and ARV-825 inhibit viral infection in a** 173 **time-dependent manner**

174 The structures of ARV-825, ZL0580, I-BET-762 and PLX51107 are shown in  
175 Figure 2A. The  $CC_{50}$  values, the concentrations of the 4 inhibitors at which they  
176 caused 50% cell death, were calculated in PAMs. The  $CC_{50}$  values of ARV-825,  
177 ZL0580, I-BET-762 and PLX51107 were determined to be 10.11  $\mu$ M (95% CI =  
178 9.18-11.11), 25.3  $\mu$ M (95% CI = 21.57-31.11), 35.86  $\mu$ M (95% CI = 25.38-86.79) and  
179 19.37  $\mu$ M (95% CI = 15.91-24.68), respectively (Figure 2B). In antiviral experiments,  
180 to mitigate their cytotoxic effects, ARV-825, ZL0580, PLX51107 and I-BET-762  
181 were used at maximum concentrations of 1  $\mu$ M, 10  $\mu$ M, 5  $\mu$ M and 10  $\mu$ M,  
182 respectively, which were lower than the  $CC_{50}$  values. The duration over which the 4  
183 inhibitors inhibited the replication of ASFV was further evaluated. The four inhibitors  
184 were added to PAM culture medium for 16 h prior to ASFV infection. Samples were  
185 collected at 4 h, 12 h, 24 h and 48 h after infection. Relative expression of the *B646L*  
186 gene was then detected by real-time PCR. The results indicated inhibitory effects to  
187 different degrees depending on the inhibitor. The inhibitory effects of ARV-825 and  
188 I-BET-762 were observed at 12 h after ASFV infection, while a strong antiviral effect  
189 at the early stages of replication that continued for 48 h was observed after ZL0580  
190 treatment (Figure 3). PLX51107 also exerted a time-dependent inhibitory effect.

191 These results indicate that these 4 inhibitors significantly inhibit the replication of  
192 ASFV at the early, middle and late stages of ASFV infection, although they inhibit the  
193 functions of BET/BRD4 in different manners.

#### 194 **Inhibitory effect of BET/BRD4 on ASFV infection of PAMs in a dose-dependent** 195 **manner**

196 In an ASFV suppression model, PAMs were treated with 4 individual  
197 inhibitors, and their potential dose-dependent antiviral activity against ASFV was  
198 evaluated. We treated ASFV-infected PAMs with the individual inhibitors at  
199 increasing concentrations from 0.1  $\mu$ M to 10  $\mu$ M depending on the inhibitor. As  
200 shown in Figure 4A, the viral yields decreased significantly from 6 to 1.6 log  
201 HAD<sub>50</sub>/ml at a concentration of 1  $\mu$ M (ARV-825), 5  $\mu$ M (PLX51107) or 10  $\mu$ M  
202 (ZL0580 and I-BET-762) ( $P < 0.05$  or 0.001). At the gene transcription level, ZL0580  
203 did not significantly suppress late ASFV *B646L* mRNA expression at concentrations  
204 lower than 2  $\mu$ M. All four inhibitors clearly suppressed the early expression of ASFV  
205 *CP204L* mRNA ( $P < 0.05$ , 0.001 or 0.0001) (Figure 4B). Importantly, further analysis  
206 of protein expression levels revealed that viral p72 protein expression levels were  
207 clearly suppressed in ASFV-infected PAMs treated with the 4 inhibitors in a  
208 dose-dependent manner, especially upon treatment with 0.25-1  $\mu$ M ARV-825, which  
209 fully inhibited expression of the p72 protein (Figure 4C). These results indicated that  
210 the four BET/BRD4 inhibitors suppressed the ASFV titer, as well as mRNA and  
211 protein synthesis during replication. Based on these results, maximum concentrations  
212 of 1  $\mu$ M (ARV-825), 10  $\mu$ M (ZL0580 and I-BET-762) and 5  $\mu$ M (PLX51107) were  
213 selected for further evaluation of the effects of the inhibitors against ASFV infection.

#### 214 **BRD4 Inhibition attenuates viral infection**

215 To determine the influence for viral infection by BRD4 inhibition, we  
216 pre-treated PAM cells with DMSO or ARV-825 for 2 h at 37°C. Then, the cells were



217 incubated with R18 labeled ASFV and BRD4 inhibitors for 1 h at 4°C.  
218 Immunofluorescence analysis indicated that the fluorescent signals in cells treated  
219 with DMSO were stronger than that in cells treated with ARV-825, thus suggesting  
220 that BRD4 inhibitors influenced ASFV attachment (Figure 5A). CD2v is outer  
221 envelope protein involved in viral attachment. Similar phenomena were also observed  
222 in determination of CD2v protein expression by Western blotting, CD2v expressed  
223 level was significantly decreased in the cells with inhibitors treatment (Figure 5B).  
224 Furthermore, we found that the viral internalization, desencapsidation and factories in  
225 infected cells with different treated time points were also affected by BRD4 inhibition.  
226 Clear fluorescent signals in cells treated with DMSO were observed and weaker  
227 signals were found in cells treated with ARV-825 (Figure 5C-E).

#### 228 **ZL0580, PLX51107, I-BET762 and ARV-825 suppress ASFV proteins synthesis**

229 To further confirm the antiviral effects of ZL0580, PLX51107, I-BET762 and  
230 ARV-825, early and late expression of the important viral structural proteins p30 and  
231 p72, respectively, was analyzed by WB analysis (Figure 6A), Immunoblot analysis  
232 showed that in the presence of ZL0580, PLX51107, I-BET762 and ARV-825, the p30  
233 and p72 protein levels in the PAMs were significantly reduced compared to those in  
234 the DMSO-treated cells, especially after treatment with ARV-825, and the expression  
235 levels of both proteins were decreased by more than 50%. Similar results were  
236 observed when expression of the ASFV p30 protein was evaluated by  
237 immunofluorescence analysis (Figure 6B). Clear fluorescent signals were detected,  
238 and the fluorescence density was higher in the DMSO-treated PAMs than in the  
239 inhibitor-treated PAMs. In contrast, the fluorescence intensity was significantly  
240 decreased in the 4 inhibitor treatment groups (Figure 6B). The percentage of cells  
241 showing early expression of the p30 protein was lower among cells treated with the  
242 BET inhibitors, as shown by flow cytometry analysis. ARV-825 treatment (1  $\mu$ M) led  
243 to the sharply loss of p30 expression in ASFV-infected PAMs, with this effect

244 followed by the effects of PLX51107, I-BET-762 and ZL0580 treatment. Compared  
245 with the DMSO-treated group, which was used as a control, the inhibitors had an at  
246 least 40% inhibitory effect (Figure 6C). These results indicated that BET/BRD4  
247 inhibition affects the early and late protein synthesis.

#### 248 **BET/BRD4 inhibitors suppress the ASFV RNA polymerase expression levels**

249 ASFV belongs to the nucleocytoplasmic large DNA virus (NCLDV) family, the  
250 members of which utilize quite complex RNA polymerases. Studies have shown that,  
251 unlike the 14 subunits encoded by eukaryotic RNA Pol II, ASFV encodes 9 subunits  
252 that are homologous to eukaryotic RNA Pol II subunits (20). BRD4 was proven to  
253 bind the positive transcription elongation factor (P-TEFb) to form a complex that is  
254 subsequently recruited to RNA Pol II of the host or virus, which then regulates the  
255 transcription of host or viral genes(17). Therefore, we further analyzed the  
256 transcription levels of the 9 subunits of ASFV RNA polymerase by real-time PCR.  
257 The results showed that ZL0580, PLX51107, I-BET-762 and ARV-825 significantly  
258 inhibited transcription of the ASFV RNA polymerase subunit genes compared to their  
259 transcription in the DMSO control group, and ARV-825 and ZL0580 treatment had a  
260 stronger inhibitory effect on gene transcription levels than treatment with the two  
261 other inhibitors (Figure 7A). We then selected ARV-825 and ZL0580 (BRD4-specific  
262 inhibitors) and evaluated their suppressive effects on the pC315R and pH359L  
263 proteins, which are homologs of TFIIB and RPB3 of the eukaryotic RNA Pol II (21),  
264 and the p30 protein. WB analysis revealed that ZL0580 and ARV-825-mediated  
265 inhibition of BET/BRD4 suppressed ASFV pC315R, pH359L and p30 protein  
266 expression (Figure 7B).

#### 267 **Interaction with BRD4**

268 We further analyzed 4 inhibitors' biological effect on BRD4 (Figure 8). Docking  
269 analysis of BET-762, PLX51107, ARV-825 and ZL0580 binding to BD1 and BD2

270 domains of BRD4 was performed. BET-762 with BRD4 BD2 (PDB code: 5dfc).  
271 BET-762 interacts with Asn429 directly and forms three indirect hydrogen bonds with  
272 Tyr386, Leu381 and His433. PLX51107 with BRD4 BD1 (PDB code: 5wmg).  
273 PLX51107 interacts with Asn140 of BRD4 BD1 directly and forms indirect hydrogen  
274 bonds with Tyr97, Asp88 and Leu92. Besides, it has a salt bridge interaction with  
275 Lys91 via COOH and a  $\pi$ - $\pi$  interaction with Trp81. OTX-015 (warhead of ARV-825)  
276 docked into BRD4 BD2. OTX-015 has a similar chemical structure with BET-762,  
277 thus their binding modes are resembling except the hydrogen bond with Asn429.  
278 ZL0580 docked into BRD4 BD1 and can't be docked into the traditional KAc pocket  
279 only if the water molecules in the cavity were deleted. It interacts with Asn140 and  
280 Asp145 directly through hydrogen bonds.

## 281 **DISCUSSION**

282 ASF, the most serious exotic pig disease, is listed as a class I animal disease in  
283 China. Since the first outbreak of ASF in Shenyang in August 2018 (22, 23) ,  
284 continuous infection has spread throughout the whole country, and ASF represents a  
285 serious threat for the global swine industry and the environment with grave economic  
286 consequences for stakeholders (24). The generation of vaccines can impede the global  
287 spread of ASF, in addition to the implementation of other measures, such as rapid  
288 diagnosis and control and eradication measures. However, commercialized vaccines  
289 for the prevention of ASFV infection remain lacking. In addition to vaccine  
290 development, the development of antiviral drugs is an important strategy to respond to  
291 ASF epidemics.

292 At present, the research and development of anti-ASFV drugs mainly focuses on  
293 two categories: (1) inhibitors that directly act on the proteins encoded by AFSV to  
294 affect its replication and (2) inhibitors that act on host protein factors required for viral  
295 replication to indirectly exert an anti-ASFV effect (25). Antiviral agents against ASFV  
296 currently include interferon (26), antibiotics (27), nucleoside analogues (28),

297 plant-derived products (29) and other compounds that have been reported to inhibit  
298 ASFV replication (25). However, the safety of action of these antiviral drugs has not  
299 been studied in depth. Therefore, the need to identify new antiviral drugs for controlling  
300 ASFV is urgent.

301         Similar to other viruses, the signs of host infection with ASFV depend on the  
302 interaction between viruses and the host. BET family members include BRD2, BRD3,  
303 BRD4 and BRDT, which are widely involved in regulating the expression of genes  
304 related to transcription, DNA repair, immunity, metabolism and signal transduction;  
305 these proteins accomplish this by identifying acetylated histones or transcription factors  
306 via their two unique bromodomains and have become promising targets for tumor  
307 therapy and viral infection (10, 15). Small-molecule inhibitors of BET family proteins  
308 may provide a promising option for cancer treatment. To date, more than ten BET  
309 inhibitors have entered clinical trials and have mainly been used for the treatment of  
310 human diseases (11, 30). However, the effects of currently available BET/BRD4  
311 inhibitors on ASFV infection are unknown.

312         During viral infection, host epigenetic factors can be involved in epigenetic  
313 modifications that affect the transcription and expression of viral genes and host genes  
314 (31, 32). Therefore, the elucidation of potential target genes of BET proteins may help  
315 reveal new functions of BET family members and provide new possibilities for  
316 clinical treatment and the combined application of BET inhibitors. The antiviral  
317 activity of BET inhibitors has been demonstrated against different viruses, including  
318 PRV (15), bovine papilloma virus (BPV) (19), human papilloma virus (HPV) (33),  
319 HIV (16), respiratory syncytial virus (RSV) (34) and Epstein-Barr virus (35).  
320 Previous studies have reported that BET inhibitors suppress the infectivity of these  
321 related viruses by decreasing macrophage and neutrophil infiltration into the airway,  
322 suppressing key inflammatory cytokines, preventing the expression of viral  
323 immediate-early proteins and/or effectively blocking BET/BRD4

324 phosphorylation-specific functions in transcription factor recruitment. Nevertheless,  
325 their antiviral effect on ASFV remains unknown.

326 In this study, we evaluated for the first time the antiviral effect of 12  
327 representative BET/BRD4 inhibitors against ASFV infection *in vitro* (Figure 1). After  
328 screening for their cytotoxicity against PAMs by CCK-8 assay, 4 BET/BRD4  
329 inhibitors were selected, and their roles in ASFV gene and protein expression were  
330 further studied. The cytotoxic effects of 12 BET/BRD4 inhibitors against PAMs  
331 were first evaluated by quantifying cell viability with a CCK-8 assay. Our results  
332 demonstrated that most of these BET inhibitors were less cytotoxic against PAMs at  
333 concentrations between 0.5  $\mu\text{M}$  and 10  $\mu\text{M}$ ; therefore, we used doses of  $\leq 10 \mu\text{M}$   
334 (ARV-825: 1  $\mu\text{M}$ ; PLX51107: 5  $\mu\text{M}$ ; I-BET-762 and ZL0580: 10  $\mu\text{M}$ ) for further  
335 experiments. We determined the  $\text{CC}_{50}$  values for the 4 selected BET inhibitors to  
336 ensure their safety in PAMs (Figure 2B). In general, primary cells are more sensitive  
337 to compound cytotoxic effect than cell lines. However, in a previous study, obvious  
338 cytotoxicity was observed when the cells were treated with BET/BRD4 inhibitors  
339 (JQ-1, OTX-015 and I-BET 151) at 30  $\mu\text{M}$  in both PK15 and HEK293 cells, while  
340 concentrations of 0-10  $\mu\text{M}$  were minimally toxic in both cell lines (15), consistent  
341 with our results obtained with PAMs. This suggests that these inhibitors are harmless  
342 at concentrations below 10  $\mu\text{M}$  in both primary cells and cell lines.

343 We performed time-of-addition studies to investigate whether the BET/BRD4  
344 inhibitors have a primary antiviral effect on ASFV CN/SC/20109, a viral strain that  
345 replicates efficiently in primary PAMs (Figure 1). Early expression of the *CP204L*  
346 gene was significantly decreased when the inhibitors were applied prior to  
347 (pretreatment) or simultaneously with virus infection ( $P < 0.05$ ), but the addition of  
348 inhibitors after ASFV infection (posttreatment) had no statistically significant effect  
349 on gene transcription levels. This suggests that the transcription of early viral genes is  
350 inhibited immediately by BET/BRD4 inhibitors when these genes begin to be largely

351 transcribed. Interestingly, *B646L* gene expression was also obviously inhibited under  
352 cotreatment with all 12 inhibitors, but 2 inhibitors had no significantly effect on  
353 *B646L* gene transcription. Earlier addition of the inhibitors had a more notable  
354 inhibitory effect on ASFV, indicating that these 12 inhibitors act over the whole  
355 ASFV transcription process. Remarkably, two BET inhibitors (I-BET-762 and  
356 PLX51107) and two BRD4-specific inhibitors (ARV-825 and ZL0580) largely  
357 inhibited ASFV infection when applied in two ways (Figure 1A-B). Furthermore, the  
358 duration of action of I-BET-762, PLX51107, ARV-825 and ZL0580 was investigated  
359 in ASFV-infected cells for 4 h, 12 h, 24 h and 48 h (Figure 3). The cells were treated  
360 with individual inhibitors for 16 h prior to ASFV infection, and *B646L* gene  
361 transcription was then detected. The data indicated that ARV-825, I-BET-762 and  
362 PLX51107 suppressed *B646L* expression in ASFV-infected cells to a similar extent at  
363 4 h and 12 h, but the effect became more significant when cells were infected at 48 h.  
364 For ZL0580, a stronger effect was observed in cells infected with ASFV for 4 h, and  
365 this effect even had a slight reduced when cells were infected with ASFV for 12 h, 24  
366 h and 48 h. In addition, the cells were treated by BRD4 inhibitors prior to infected  
367 with ASFV at different time points dependent on the infected stages of its life cycle.  
368 The results indicated that the inhibitors could suppress ASFV infection. In general,  
369 the inhibitory effects were time-dependent. It is likely that BET/BRD4 inhibition  
370 induces cell cycle arrest or different biological activities; thus, the effects of these  
371 inhibitors on ASFV infection may vary by times being added to the culture.

372 Interestingly, some BET/BRD4 inhibitors do not affect PRV or PRRSV viral  
373 gene transcription (15). In contrast, other previous studies have demonstrated that  
374 BRD4 facilitates viral infection through the regulation of HSV-1 and HSV-2 viral  
375 gene transcription, and that through inhibiting BRD4, HSV-1 and HSV-2 viral  
376 infection and gene transcription, and protein synthesis were significantly suppressed  
377 in a dose-dependent manner (17). This suggests that modulation of similar or same

378 target proteins (e.g., BET protein family) or pathways by different regulatory agents  
379 (different BET/BRD4 inhibitors) may induce distinct functional outcomes in different  
380 viral infections. Epigenetic modifications in the cell may be changed by altering  
381 activity of BET/BRD4 to further affect the transcription and expression of both viral  
382 and host genes. Understanding the regulatory mechanism of BET/BRD4 inhibitors  
383 and their roles in ASFV infection needs further studies. Collectively, our results  
384 suggest that BET inhibitors have therapeutic potential for control of ASFV infection.

385 I-BET-762 inhibits BET proteins by occupying the acetyl-lysine-binding  
386 pocket of BET proteins, inhibiting the binding of BET proteins to acetylated histones,  
387 and thereby prevents the formation of chromatin complexes responsible for the  
388 expression of key inflammatory genes in activated macrophages and primary human  
389 monocytes (36). PLX51107 is a novel, structurally distinct BET inhibitor. In a group  
390 of cultured cells, treatment with PLX51107 for a short period (4 hours) led to a sharp  
391 decrease in c-Myc levels but did not immediately cause an apoptotic response. After  
392 prolonged treatment time (continuous culture for 16 hours or longer), PLX51107  
393 induced apoptosis. Proteolysis targeting chimeric (PROTAC) molecules are a novel  
394 family of compounds with the ability to bind their target proteins and recruit an  
395 ubiquitin ligase, which promotes degradation of the targeted protein (37). ARV-825 is  
396 a PROTAC compound and BRD4 protein degrader that can recruit BRD4 to the E3  
397 ubiquitin ligase cereblon to induce rapid, effective and continuous degradation of the  
398 BRD4 protein, continuously lowering c-Myc levels (38, 39). Compared with other  
399 BRD4 inhibitors, ARV-825 treatment caused more significant changes in c-MYC  
400 levels and downstream cell proliferation and apoptosis induction (38). In our study,  
401 the dose-dependent inhibitory effects of ARV-825 were not as remarkable as those of  
402 ZL0580, PLX51107 or I-BET762. ARV-825 significantly inhibited ASFV *CP204L*  
403 and *B646L* mRNA and protein levels compared with those upon application of the  
404 other inhibitors at a lower concentration. To date, there have been no reports with

405 respect to the effects of above three BET/BRD4 inhibitors on viral infection. ZL0580  
406 is a BRD4-specific inhibitor that was designed by analyzing the crystal structures of  
407 available BRD4 modulators with the BRD4 BD1 domain (11). It displayed potent  
408 BRD4-binding activity with an  $IC_{50} = 163$  nM against the BRD4 BD1 domain with  
409 6.6-fold selectivity over the BRD4 BD2 domain. ZL0580 is a novel, BRD4-selective,  
410 small-molecule modulator that was reported to suppress both induced and basal HIV  
411 transcription and blocks viral reactivation events in human T cells and several latently  
412 infected myeloid cell lines. ZL0580 induces HIV suppression by inhibiting  
413 Tat-mediated transcription elongation and inducing a repressive chromatin structure at  
414 the HIV promoter (16, 40).

415 In our study, different assays (HAD, real-time PCR and WB analysis) showed  
416 that 4 inhibitors significantly inhibited ASFV infection in PAMs in a dose-dependent  
417 manner. A cumulative suppressive effect on ASFV infection was observed,  
418 suggesting that the BRD4 inhibitors specifically act on BRD4 to reduce ASFV  
419 infection (Figure 4-6). After characterizing these 4 inhibitors, we speculate that  
420 BET/BRD4 is helpful for ASFV infection, and the virus may take advantage of  
421 BET/BRD4 that is released from chromatin to the viral genome to promote viral  
422 replication and gene transcription. ASFV encodes approximately 20 genes that are  
423 involved in the transcription and modification of its mRNA (20). Our results indicated  
424 that the transcript levels of 9 related genes of ASFV were significantly decreased after  
425 treatment with the 4 individual BET/BRD4 inhibitors (Figure 7). ASFV carries a set  
426 of enzymes similar to eukaryotic RNA Pol II, and their homology with RNA Pol II is  
427 higher than that with other nuclear or cytoplasmic large DNA molecules (24).  
428 Interestingly, ZL0580, PLX51107, I-BET762 and ARV-825 inhibit the 9 subunits of  
429 ASFV RNA polymerase, which suggests that ZL0580, PLX51107, I-BET762 and  
430 ARV-825 exert their antiviral effects by altering ASFV transcription. It remains to be  
431 elucidated whether BET/BRD4 recruits P-TEFb to viral RNA polymerase and further



432 regulates viral gene transcription or whether ASFV infection alters host chromatin  
433 status and utilizes host epigenetic modifications to facilitate viral replication. The  
434 regulatory mechanisms and the role of epigenetic BET/BRD4 in ASFV infection need  
435 to be further investigated.

436 While great progress has been made in understanding the interactions between  
437 ASFV and host, many unknowns still require further exploration. This study provides  
438 multiple lines of evidence to support that downregulation of early and late ASFV gene  
439 expression is associated with inhibition of BET/BRD4 activation and thus has a  
440 suppressive effect on ASFV infection. Extensive study of the role of BET/BRD4 in  
441 ASFV replication will be helpful to unravel the interactions between this virus and  
442 host cells and provide insights into development of new approaches for control of  
443 ASFV infection.

444

## 445 **MATERIALS AND METHODS**

446 **Biosafety statement and facility.** All experiments carried out with live ASFV were  
447 performed in a biosafety level-3 (BSL-3) laboratory at the Lanzhou Veterinary  
448 Research Institute (LVRI), Chinese Academy of Agriculture and Sciences (CAAS) and  
449 were accredited by the China National Accreditation Service for Conformity  
450 Assessment (CNAS) and approved by the Ministry of Agriculture and Rural Affairs. In  
451 the laboratory, to reduce any potential risk, all protocols were strictly followed, and all  
452 activities were monitored by the professional staff at LVRI and randomly inspected by  
453 local and central governmental authorities without advance notice.

454 **Cells culture and ASFV.** Primary alveolar macrophages (PAMs) were isolated from  
455 50-60-day-old specific pathogen-free (SPF) pigs and stored at the African Swine Fever  
456 Regional Laboratory (Lanzhou). The PAMs were cultured in RPMI 1640 medium  
457 (Thermo Scientific, USA) with L-glutamine and 25 mM HEPES (Gibco) supplemented

458 with 10% fetal bovine serum (FBS, Gibco, Australia), 100 IU/ml penicillin and 100  
459 µg/ml streptomycin (Gibco, Life Technologies) at 37 °C under 5% CO<sub>2</sub>. The ASFV  
460 strain used in this study (CN/SC/2019) was provided by the African Swine Fever  
461 Regional Laboratory (Lanzhou).

462 **Antibodies and reagents.** For western blot (WB) analysis, anti-p30, -p72,  
463 anti-pC315R and anti-pH359L rabbit sera were raised against recombinant ASFV p30,  
464 p72 pC315R and pH359L proteins and deposited at the African Swine Fever Regional  
465 Laboratory (Lanzhou), Lanzhou Veterinary Research Institute (LVRI) of the Chinese  
466 Academy of Agricultural Sciences. Anti-CD2v mouse sera were kindly provided by  
467 Prof. Liguang Zhang from Institute of Biophysics, Chinese Academy of Sciences.  
468 Anti-β-Actin (13E5) rabbit monoclonal antibody (Cat. no. 4970) and anti-GAPDH  
469 (14C10) rabbit monoclonal antibody (Cat. no. 2118) were purchased from Cell  
470 Signaling Technology. Anti-β-tubulin rabbit polyclonal antibody (Cat. no. 10094-1-AP)  
471 and HRP-conjugated AffiniPure goat anti-rabbit IgG (H+L) (Cat. no. SA00001-2) were  
472 purchased from ProteinTech Group. FITC-conjugated goat anti-rabbit IgG secondary  
473 antibody (Cat. no. F0382) was purchased from Sigma-Aldrich. A Cell Counting Kit-8  
474 (CCK-8) (Cat. no. K1018-30) was purchased from APEX-BIO (MA, USA). TRIzol™  
475 reagent (Cat. no. 15596018), 4', 6-diamidino-2'-phenylindole (DAPI) (Cat. no. 62248),  
476 fluorescent dyes R18 (Cat. no. O246) and RIPA lysis and extraction buffers (Cat. no.  
477 89901) were purchased from Thermo Fisher Scientific. 5-ethynyl-2'-deoxy-uridine  
478 (EdU) (Cat. no. C00031) was purchased from Guangzhou RIBOBIO. Co., Ltd.

479 **BET/BRD4 chemical inhibitors.** Apabetalone (RVX-208) (BET inhibitor, S7295),  
480 ARV-825 (BRD4 specific inhibitor, S8297), AZD-5153 6-hydroxy-2-naphthoic acid  
481 (BET/BRD4 inhibitor, S8344), CPI-203 (BET inhibitor, S7304), Molibresib  
482 (I-BET-762) (BET inhibitor, S7189), (+)-JQ1 (BET inhibitor, S7110), INCB054329  
483 (BET inhibitor, S8753), MS436 (BET inhibitor, S7305), Birabresib (OTX015) (BET  
484 inhibitor, S7360), PLX51107 (a new BET inhibitor, S8739) and PFI-1 (PF-6405761)

485 (BRD2/BRD4 inhibitor, S1216) were purchased from Selleck.cn, ZL0580 (BRD4  
486 specific inhibitor) was prepared as previously described (16). The structures and  
487 functions of these inhibitors are shown in Figure 2A and S1 (<https://www.selleck.cn/>)  
488 and Table 1 (16, 38, 41-50).

489 **Cytotoxicity assay.** The cytotoxicity of 12 representative inhibitors in PAMs was  
490 evaluated by using a CCK-8 kit. Briefly, PAMs ( $2 \times 10^5$  cells per well) in 96-well cell  
491 culture plates were treated with the inhibitors at increasing concentrations (from 0.5  
492  $\mu\text{M}$  to 240  $\mu\text{M}$ ). The experiments included three replicates, and a blank and DMSO  
493 control were included. The treated cells were incubated for 24 h at 37 °C in 5% CO<sub>2</sub>,  
494 and after incubation, 10  $\mu\text{L}$  of CCK-8 reagent was added to each well and incubated  
495 at 37 °C for 1-4 h. The absorbance at 450 nm was measured using a microplate reader.  
496 The viability of the PAMs was calculated according to the following formula: cell  
497 viability (%) = [(OD inhibitor - OD blank) / (OD control- OD blank)]  $\times$  100.

498 **Virus HAD<sub>50</sub> assay.** PAMs were seeded in 96-well plates and cultured overnight at 37 °C  
499 under 5% CO<sub>2</sub>. The cells were then pretreated with DMSO, PLX51107, ARV-825,  
500 ZL0580 and I-BET-762 for 16 h, after which 10-fold serial dilutions ( $10^0$ - $10^{-12}$ ) of virus  
501 were inoculated into each well (with eight replicates for each dilution), with pig  
502 erythrocytes (1:1000) added to each well at the same time. The ASFV was quantified  
503 by the formation of characteristic rosettes formed through hemadsorption (HAD) of  
504 erythrocytes around the infected cells. HAD activity was observed for 7 consecutive  
505 days after inoculation, and the 50% HAD dose (HAD<sub>50</sub>) was calculated by using the  
506 Reed and Muench method (51).

507 **Time-of-addition assay.** PAMs in 12-well plates ( $2 \times 10^6$  cells/well) were seeded for  
508 ASFV infection. In the pretreatment assay, PAMs were treated with 12 individual  
509 BET/BRD4 inhibitors for 16 h before infection with ASFV CN/SC/2019 (MOI = 0.1).  
510 In the cotreatment assay, PAMs were exposed to 12 individual BET/BRD4 inhibitors  
511 at the same time that the ASFV was added to the plates. The plates were then

512 incubated at 37 °C under 5% CO<sub>2</sub> for 24 h. In the posttreatment assay, cells were  
513 infected with ASFV, and the inhibitors were then added 4 h after infection. The plates  
514 were then incubated at 37 °C under 5% CO<sub>2</sub> for 16 h. DMSO-treated cells when then  
515 infected with ASFV for different assays in individual wells. The viruses were  
516 collected, titrated by HAD assay, and quantified by real-time PCR and WB analysis.

517 **Quantification of cell-associated ASFV mRNA.** To quantify ASFV mRNA in  
518 ASFV-infected PAMs, total RNA was extracted from different PAM samples using a  
519 standard protocol with TRIzol™ reagent (Life Technologies), followed by chloroform  
520 extraction and precipitation with isopropyl alcohol and ethanol. cDNA was  
521 synthesized from the RNA using the PrimeScript™ RT Reagent Kit with gDNA  
522 Eraser (Takara Bio Inc, Shiga, Japan) according to the manufacturer's instructions.  
523 Gene expression in the cDNA samples was measured by one-step qRT-PCR using a  
524 One Step PrimeScript RT-PCR Kit (Perfect Real Time) according to the  
525 manufacturer's specifications (Takara, Dalian, China). Quantitative real-time PCR  
526 was performed on the CFX Connect Real-Time PCR Detection System (Bio-Rad,  
527 USA). The sequences of primers and probes specific for the *B646L* gene were  
528 obtained according to the OIE-recommended sequence described in King et al (52).  
529 Primer and probe sequences specific for other genes were designed in this study  
530 (Table 2). All samples were run and analyzed in duplicate. The RNA expression of  
531 each target gene in the PAMs was normalized to GAPDH expression and then  
532 calculated using the  $2^{-\Delta\Delta CT}$  method.

533 **Western blotting (WB) analysis.** PAMs were seeded in 6-well plates overnight and  
534 treated with ZL0580, I-BET-76, PLX51107, ARV-825 or DMSO 16 h prior to  
535 inoculation, followed by infection with the ASFV CN/SC/2019 strain (MOI=1) for 48 h.  
536 The cells were harvested, washed and then lysed in RIPA lysis and extraction buffers  
537 supplemented with a protease inhibitor cocktail and 1 mM PMSF by rotation at room  
538 temperature (RT) for 1 h. The total protein concentration was measured using a

539 Microplate BCA Protein Assay Kit (Pierce™, Thermo Fisher Scientific). Proteins were  
540 separated on an SDS-PAGE gel and then transferred to a nitrocellulose (NC) membrane  
541 (Merck Millipore, ISEQ00010), which was incubated with individual protein-specific  
542 primary antibodies at 4 °C overnight on a shaker. The membrane was then incubated  
543 with horseradish peroxidase (HRP)-linked secondary antibodies for 1 h at RT. The  
544 reaction was detected with Immobilon™ western HRP substrate (B1911-100ML,  
545 Sigma). The corresponding grayscale value for each expressed protein band was  
546 analyzed using ImageJ software.

547 **Confocal microscopy.** PAMs were seeded in 2-cm laser confocal dishes and  
548 pretreated with ZL0580 (10 µM), I-BET-762 (2 µM), PLX51107 (5 µM), ARV-825  
549 (0.5 µM) or DMSO at 37°C for 4h, and then removed the compounds. The treated  
550 PAMs were infected with ASFV or fluorescent dye R18 labeled ASFV at an MOI of  
551 100 at 4 °C for 1 hour (binding), or cultured the cells at 37 °C for 1.5h  
552 (internalization), or ASFV-infected cells were exposed to EdU for 3h  
553 (desencapsidation) or 24h (viral factories) before collection. The cells were fixed in a  
554 buffer containing 4% paraformaldehyde and 10 mM piperazine-N, N-bis  
555 (2-ethanesulfonic acid) in PBS at pH 6.4 for 10 min. After one wash and incubation  
556 with primary antibodies diluted in blocking buffer without Triton X-100 at 4 °C  
557 overnight. Then, the cells were stained with FITC-conjugated goat anti-rabbit IgG  
558 secondary antibody for 1 h at RT. Cells were acquired using confocal microscopy  
559 (Leica, TCS SP8).

560 **Flow cytometry assay.** Cells were pre-treated with compounds for 16 h, and then  
561 infected with ASFV (MOI = 1) and simultaneously treated with compounds for 24 h.  
562 Cells were collected by centrifugation and suspended in phosphate-buffered saline  
563 (PBS) and stained for DNA (with DAPI), and anti-ASFV rabbit antibody p30.  
564 Cytometry acquisition was performed on a BD Accuri® C6 Plus instrument, and the  
565 data were analyzed using the program FlowJo v10.6.2.

566 **Binding modes of PLX51107, I-BET762, ZL0580 and ARV-825 with BRD4.** The  
567 docking study was performed with Schrödinger Small-Molecule Drug Discovery Suite.  
568 The crystal structure of BRD4 BD1 (PDB code: 5wmg) and BRD4 BD2 (PDB code:  
569 5dfc) were downloaded from RCSB PDB Bank and prepared with Protein Prepared  
570 Wizard. During this step, hydrogens were added, crystal waters were removed while  
571 water molecules around the KAc pocket were kept (all the water molecules were  
572 removed in the case of ZL0580), and partial charges were assigned using the  
573 OPLS-2005 force field. The 3D structures of ZL0580 and ARV-825 were created with  
574 Schrödinger Maestro, and the initial lowest energy conformations were calculated with  
575 LigPrep. For all dockings, the grid center was chosen on the centroid of included ligand  
576 of PDB structure KAc site and a  $20 \times 20 \times 20$  Å grid box size was used. All dockings  
577 were employed with Glide using the SP protocol. Docking poses were incorporated into  
578 Schrödinger Maestro for a visualization of ligand-receptor interactions.

579 **Statistical analysis.** Statistical analyses of all data were performed using Prism 8.0  
580 (GraphPad Software, Inc.). Statistical comparisons between groups were performed  
581 using paired or nonpaired t tests. Two-tailed p values were determined, and a p value <  
582 0.05 was considered to indicate statistical significance (\*  $P < 0.05$ ; \*\*  $P < 0.01$ , \*\*\*  $P$   
583 < 0.001 and \*\*\*\*  $P < 0.0001$ ). The quantitative data in all Figures are expressed as the  
584 mean  $\pm$  SD (indicated by the error bars). The 50% cell cytotoxicity (CC<sub>50</sub>) was  
585 calculated by a linear regression analysis of dose-response curves generated from the  
586 obtained data. The 95% confidence intervals (95% CIs) for CC<sub>50</sub> values were calculated  
587 using IBM SPSS Statistics v19.0.

588

## 589 **ACKNOWLEDGEMENTS**

590 This study was financially supported by the National Natural Science Foundation of  
591 China (Grant Nos.32072830); Gansu Provincial Major project for science and  
592 technology development (Grant Nos. 20ZD7NA006); State Key Laboratory of

593 Veterinary Etiological Biology, Lanzhou Veterinary Research Institute, Chinese  
594 Academy of Agricultural Sciences (Grant Nos. SKLVEB2020CGPY02); Basic  
595 scientific research business expenses budget incremental project, Chinese Academy of  
596 Agricultural Sciences, Lanzhou veterinary research institute (Grant Nos.  
597 1610312021002).

598 QLN, GQG, ZJL, JXL and HY conceived and designed the study, YRZ, SXY  
599 and QLN participated in the whole experiments, QLN wrote the manuscript. JJY,  
600 ZHZ, SXG and JF isolated the PAM cells. ZQL and JZ synthesized the BRD4  
601 inhibitor ZL0580 and revised the manuscript. HTH analyzed the data and revised the  
602 manuscript.

603 We would like to thank Dr. Yongxiang Fang from Lanzhou Veterinary Research  
604 Institute (LVRI), Chinese Academy of Agriculture and Sciences (CAAS) for help with  
605 the flow cytometry assay; AJE for English language editing. All authors reviewed the  
606 manuscript and declared that they have no competing interests.

607

## 608 REFERENCES

- 609 1. De la Torre A, Bosch J, Iglesias I, Muñoz MJ, Mur L, Martínez-López B, Martínez M,  
610 Sánchez-Vizcaíno JM. 2015. Assessing the Risk of African Swine Fever Introduction  
611 into the European Union by Wild Boar. *Transbound Emerg Dis* 62:272-9.
- 612 2. Revilla Y, Pérez-Núñez D, Richt JA. 2018. African Swine Fever Virus Biology and  
613 Vaccine Approaches. *Adv Virus Res* 100:41-74.
- 614 3. Zhao D, Liu R, Zhang X, Li F, Wang J, Zhang J, Liu X, Wang L, Zhang J, Wu X, Guan  
615 Y, Chen W, Wang X, He X, Bu Z. 2019. Replication and virulence in pigs of the first  
616 African swine fever virus isolated in China. *Emerg Microbes Infect* 8:438-447.
- 617 4. Gómez-Villamandos JC, Bautista MJ, Sánchez-Cordón PJ, Carrasco L. 2013.  
618 Pathology of African swine fever: The role of monocyte-macrophage. *Virus Res*  
619 173:140-149.
- 620 5. García-Beato R, Salas ML, Viuela E, Salas J. 1992. Role of the host cell nucleus in the  
621 replication of African swine fever virus DNA. *Virology* 188:637-649.
- 622 6. Rojo G, García-Beato R, Viñuela E, Salas M L, Salas J. 1999. Replication of African  
623 swine fever virus DNA in infected cells. *Virology* 257:524-536.

- 624 7. Correia S, Ventura S, Parkhouse RM. 2013. Identification and utility of innate immune  
625 system evasion mechanisms of ASFV. *Virus Res* 173:87-100.
- 626 8. Ramiro-Ibáñez F, Ortega A, Brun A, Escribano JM, Alonso C. 1996. Apoptosis: a  
627 mechanism of cell killing and lymphoid organ impairment during acute African swine  
628 fever virus infection. *J Gen Virol* 77 ( Pt 9):2209-2219.
- 629 9. Yu L, Wang Z, Zhang Z, Ren X, Lu X, Ding K. 2015. Small-molecule BET inhibitors  
630 in clinical and preclinical development and their therapeutic potential. *Curr Top Med*  
631 *Chem* 15:776-794.
- 632 10. Fu LL, Tian M, Li X, Li JJ, Huang J, Ouyang L, Zhang Y, Liu B. 2015. Inhibition of  
633 BET bromodomains as a therapeutic strategy for cancer drug discovery. *Oncotarget*  
634 6:5501-5516.
- 635 11. Liu Z, Wang P, Chen H, Wold EA, Tian B, Brasier AR, Zhou J. 2017. Drug Discovery  
636 Targeting Bromodomain-Containing Protein 4. *J Med Chem* 60:4533-4558.
- 637 12. Devaiah BN, Gegonne A, Singer DS. 2016. Bromodomain 4: a cellular Swiss army  
638 knife. *J Leukoc Biol* 100:679-686.
- 639 13. Hsu SC, Blobel GA. 2017. The Role of Bromodomain and Extraterminal Motif (BET)  
640 Proteins in Chromatin Structure. *Cold Spring Harb Symp Quant Biol* 82:37-43.
- 641 14. Wu SY, Chiang CM. 2007. The Double Bromodomain-containing Chromatin Adaptor  
642 Brd4 and Transcriptional Regulation. *J Biol Chem* 282:13141-13145.
- 643 15. Wang J, Li GL, Ming SL, Wang CF, Shi LJ, Su BQ, Wu HT, Zeng L, Han YQ, Liu ZH,  
644 Jiang DW, Du YK, Li XD, Zhang GP, Yang GY, Chu BB. 2020. BRD4 inhibition  
645 exerts anti-viral activity through DNA damage-dependent innate immune responses.  
646 *PLoS Pathog* 16:e1008429.
- 647 16. Niu Q, Liu Z, Alamer E, Fan X, Chen H, Endsley J, Gelman BB, Tian B, Kim JH,  
648 Michael NL, Robb ML, Ananworanich J, Zhou J, Hu H. 2019. Structure-guided drug  
649 design identifies a BRD4-selective small molecule that suppresses HIV. *J Clin Invest*  
650 129:3361-3373.
- 651 17. Ren K, Wei Z, Chen X, Ma Y, Dai Y, Fan Y, Hou Y, Tan RX, Li E. 2016. An  
652 Epigenetic Compound Library Screen Identifies BET Inhibitors That Promote HSV-1  
653 and -2 Replication by Bridging P-TEFb to Viral Gene Promoters through BRD4. *PLoS*  
654 *Pathog* 12:e1005950.
- 655 18. Wu SY, Lee AY, Hou SY, Kemper JK, Erdjument-Bromage H, Tempst P, Chiang CM.  
656 2006. Brd4 links chromatin targeting to HPV transcriptional silencing. *Genes Dev*  
657 20:2383-2396.
- 658 19. You J, Croyle JL, Nishimura A, Ozato K, Howley PM. 2004. Interaction of the bovine  
659 papillomavirus E2 protein with Brd4 tethers the viral DNA to host mitotic  
660 chromosomes. *Cell* 117:349-360.
- 661 20. Rodríguez JM, Salas ML. 2013. African swine fever virus transcription. *Virus Res*  
662 173:15-28.
- 663 21. Iyer LM, Balaji S, Koonin EV, Aravind L. 2006. Evolutionary genomics of  
664 nucleo-cytoplasmic large DNA viruses. *Virus Res* 117:156-184.



- 665 22. Zhou X, Li N, Luo Y, Liu Y, Miao F, Chen T, Zhang S, Cao P, Li X, Tian K, Qiu HJ,  
666 Hu R. 2018. Emergence of African Swine Fever in China, 2018. *Transbound Emerg*  
667 *Dis* 65:1482-1484.
- 668 23. Wang Q, Ren W, Bao J, Ge S, Li J, Li L, Fan X, Liu C, Wang H, Zhang Y, Xu T, Duan  
669 Y, Gu G, Zhou C, Wu X. 2018. The First Outbreak of African Swine Fever was  
670 Confirmed in China. *China Animal Health Inspection* 35:1-4.
- 671 24. Cackett G, Matelska D, Sýkora M, Portugal R, Malecki M, Bähler J, Dixon L, Werner  
672 F. 2020. The African Swine Fever Virus Transcriptome. *J Virol* 94: e00119-20.
- 673 25. Arabyan E, Kotsynyan A, Hakobyan A, Zakaryan H. 2019. Antiviral agents against  
674 African swine fever virus. *Virus Res* 270:197669.
- 675 26. Fan W, Jiao P, Zhang H, Chen T, Zhou X, Qi Y, Sun L, Shang Y, Zhu H, Hu R, Liu W,  
676 Li J. 2020. Inhibition of African Swine Fever Virus Replication by Porcine Type I and  
677 Type II Interferons. *Front Microbiol* 11:1203.
- 678 27. Mottola C, Freitas FB, Simões M, Martins C, Leitão A, Ferreira F. 2013. In vitro  
679 antiviral activity of fluoroquinolones against African swine fever virus. *Vet Microbiol*  
680 165:86-94.
- 681 28. Hakobyan A, Galindo I, Nañez A, Arabyan E, Karalyan Z, Chistov AA, Streshnev PP,  
682 Korshun VA, Alonso C, Zakaryan H. 2018. Rigid amphipathic fusion inhibitors  
683 demonstrate antiviral activity against African swine fever virus. *J Gen Virol*  
684 99:148-156.
- 685 29. Arabyan E, Hakobyan A, Kotsynyan A, Karalyan Z, Arakelov V, Arakelov G,  
686 Nazaryan K, Simonyan A, Aroutiounian R, Ferreira F, Zakaryan H. 2018. Genistein  
687 inhibits African swine fever virus replication in vitro by disrupting viral DNA  
688 synthesis. *Antiviral Res* 156:128-137.
- 689 30. Brasier AR, Zhou J. 2020. Validation of the epigenetic reader  
690 bromodomain-containing protein 4 (BRD4) as a therapeutic target for treatment of  
691 airway remodeling. *Drug Discov Today* 25:126-132.
- 692 31. Weller SK, Coen DM. 2012. Herpes simplex viruses: mechanisms of DNA replication.  
693 *Cold Spring Harb Perspect Biol* 4:a013011.
- 694 32. Arbuckle JH, Kristie TM. 2014. Epigenetic repression of herpes simplex virus  
695 infection by the nucleosome remodeler CHD3. *mBio* 5:e01027-13.
- 696 33. Wu SY, Nin DS, Lee AY, Simanski S, Kodadek T, Chiang CM. 2016. BRD4  
697 Phosphorylation Regulates HPV E2-Mediated Viral Transcription, Origin Replication,  
698 and Cellular MMP-9 Expression. *Cell Rep* 16:1733-1748.
- 699 34. Nguyen TH, Maltby S, Eyers F, Foster PS, Yang M. 2016. Bromodomain and Extra  
700 Terminal (BET) Inhibitor Suppresses Macrophage-Driven Steroid-Resistant  
701 Exacerbations of Airway Hyper-Responsiveness and Inflammation. *PLoS One*  
702 11:e0163392.
- 703 35. Keck KM, Moquin SA, He A, Fernandez SG, Somberg JJ, Liu SM, Martinez DM,  
704 Miranda JL. 2017. Bromodomain and extraterminal inhibitors block the Epstein-Barr  
705 virus lytic cycle at two distinct steps. *J Biol Chem* 292:13284-13295.

- 706 36. Nicodeme E, Jeffrey KL, Schaefer U, Beinke S, Dewell S, Chung CW, Chandwani R,  
707 Marazzi I, Wilson P, Coste H, White J, Kirilovsky J, Rice CM, Lora JM, Prinjha RK,  
708 Lee K, Tarakhovsky A. 2010. Suppression of inflammation by a synthetic histone  
709 mimic. *Nature* 468:1119-23.
- 710 37. Wang P, Zhou J. 2018. Proteolysis Targeting Chimera (PROTAC): A  
711 Paradigm-Shifting Approach in Small Molecule Drug Discovery. *Curr Top Med Chem*  
712 18:1354-1356.
- 713 38. Lu J, Qian Y, Altieri M, Dong H, Wang J, Raina K, Hines J, Winkler JD, Crew AP,  
714 Coleman K, Crews CM. 2015. Hijacking the E3 Ubiquitin Ligase Cereblon to  
715 Efficiently Target BRD4. *Chem Biol* 22:755-63.
- 716 39. Noblejas-López MDM, Nieto-Jimenez C, Burgos M, Gómez-Juárez M, Montero JC,  
717 Esparís-Ogando A, Pandiella A, Galán-Moya EM, Ocaña A. 2019. Activity of  
718 BET-proteolysis targeting chimeric (PROTAC) compounds in triple negative breast  
719 cancer. *J Exp Clin Cancer Res* 38:383.
- 720 40. Alamer E, Zhong C, Liu Z, Niu Q, Long F, Guo L, Gelman BB, Soong L, Zhou J, Hu H.  
721 2020. Epigenetic Suppression of HIV in Myeloid Cells by the BRD4-Selective Small  
722 Molecule Modulator ZL0580. *J Virol* 94: e01880-19.
- 723 41. Picaud S, Wells C, Felletar I, Brotherton D, Martin S, Savitsky P, Diez-Dacal B,  
724 Philpott M, Bountra C, Lingard H, Fedorov O, Müller S, Brennan PE, Knapp S,  
725 Filippakopoulos P. 2013. RVX-208, an inhibitor of BET transcriptional regulators with  
726 selectivity for the second bromodomain. *Proc Natl Acad Sci U S A* 110:19754-9.
- 727 42. Bradbury RH, Callis R, Carr GR, Chen H, Clark E, Feron L, Glossop S, Graham MA,  
728 Hattersley M, Jones C, Lamont SG, Ouvry G, Patel A, Patel J, Rabow AA, Roberts CA,  
729 Stokes S, Stratton N, Walker GE, Ward L, Whalley D, Whittaker D, Wrigley G,  
730 Waring MJ. 2016. Optimization of a Series of Bivalent Triazolopyridazine Based  
731 Bromodomain and Extraterminal Inhibitors: The Discovery of  
732 (3R)-4-[2-[4-[1-(3-Methoxy-[1,2,4]triazolo[4,3-b]pyridazin-6-yl)-4-piperidyl]phenoxy  
733 ethyl]-1,3-dimethyl-piperazin-2-one (AZD5153). *J Med Chem* 59:7801-17.
- 734 43. Hultmark S, Baudet A, Schmiderer L, Prabhala P, Palma-Tortosa S, Sandén C, Fioretos  
735 T, Sasidharan R, Larsson C, Lehmann S, Juliusson G, Ek F, Magnusson M. 2020.  
736 Combinatorial molecule screening identifies a novel diterpene and the BET inhibitor  
737 CPI-203 as differentiation inducers of primary acute myeloid leukemia cells.  
738 *Haematologica* 106:2566-2577.
- 739 44. Bandukwala HS, Gagnon J, Togher S, Greenbaum JA, Lamperti ED, Parr NJ,  
740 Molesworth AM, Smithers N, Lee K, Witherington J, Tough DF, Prinjha RK, Peters B,  
741 Rao A. 2012. Selective inhibition of CD4+ T-cell cytokine production and  
742 autoimmunity by BET protein and c-Myc inhibitors. *Proc Natl Acad Sci U S A*  
743 109:14532-7.
- 744 45. Drusbosky LM, Vidva R, Gera S, Lakshminarayana AV, Shyamasundar VP, Agrawal  
745 AK, Talawdekar A, Abbasi T, Vali S, Tognon CE, Kurtz SE, Tyner JW, McWeeney

- 746 SK, Druker BJ, Cogle CR. 2019. Predicting response to BET inhibitors using  
747 computational modeling: A BEAT AML project study. *Leuk Res* 77:42-50.
- 748 46. Filippakopoulos P, Qi J, Picaud S, Shen Y, Smith WB, Fedorov O, Morse EM, Keates  
749 T, Hickman TT, Felletar I, Philpott M, Munro S, McKeown MR, Wang Y, Christie AL,  
750 West N, Cameron MJ, Schwartz B, Heightman TD, La Thangue N, French CA, Wiest  
751 O, Kung AL, Knapp S, Bradner JE. 2010. Selective inhibition of BET bromodomains.  
752 *Nature* 468:1067-73.
- 753 47. Zhang G, Plotnikov AN, Rusinova E, Shen T, Morohashi K, Joshua J, Zeng L, Mujtaba  
754 S, Ohlmeyer M, Zhou MM. 2013. Structure-guided design of potent diazobenzene  
755 inhibitors for the BET bromodomains. *J Med Chem* 56:9251-64.
- 756 48. Berthon C, Raffoux E, Thomas X, Vey N, Gomez-Roca C, Yee K, Taussig DC, Rezai  
757 K, Roumier C, Herait P, Kahatt C, Quesnel B, Michallet M, Recher C, Lokiec F,  
758 Preudhomme C, Dombret H. 2016. Bromodomain inhibitor OTX015 in patients with  
759 acute leukaemia: a dose-escalation, phase 1 study. *Lancet Haematol* 3:e186-95.
- 760 49. Ozer HG, El-Gamal D, Powell B, Hing ZA, Blachly JS, Harrington B, Mitchell S,  
761 Grieselhuber NR, Williams K, Lai TH, Alinari L, Baiocchi RA, Brinton L, Baskin E,  
762 Cannon M, Beaver L, Goettl VM, Lucas DM, Woyach JA, Sampath D, Lehman AM,  
763 Yu L, Zhang J, Ma Y, Zhang Y, Spevak W, Shi S, Severson P, Shellooe R, Carias H,  
764 Tsang G, Dong K, Ewing T, Marimuthu A, Tantoy C, Walters J, Sanftner L, Rezaei H,  
765 Nespi M, Matusow B, Habets G, Ibrahim P, Zhang C, Mathé EA, Bollag G, Byrd JC,  
766 Lapalombella R. 2018. BRD4 Profiling Identifies Critical Chronic Lymphocytic  
767 Leukemia Oncogenic Circuits and Reveals Sensitivity to PLX51107, a Novel  
768 Structurally Distinct BET Inhibitor. *Cancer Discov* 8:458-477.
- 769 50. Picaud S, Da Costa D, Thanasopoulou A, Filippakopoulos P, Fish PV, Philpott M,  
770 Fedorov O, Brennan P, Bunnage ME, Owen DR, Bradner JE, Taniere P, O'Sullivan B,  
771 Müller S, Schwaller J, Stankovic T, Knapp S. 2013. PFI-1, a highly selective protein  
772 interaction inhibitor, targeting BET Bromodomains. *Cancer Res* 73:3336-46.
- 773 51. Reed LJ. 1938. A simple method of examining fifty percent endpoints. *Amjhyg* 27.
- 774 52. King DP, Reid SM, Hutchings GH, Grierson SS, Wilkinson PJ, Dixon LK, Bastos AD,  
775 Drew TW. 2003. Development of a TaqMan PCR assay with internal amplification  
776 control for the detection of African swine fever virus. *J Virol Methods* 107:53-61.

777

778

## 779 **Figure legends**

780 **Figure 1: Effect of BET family inhibitors on ASFV gene transcription.** (A) Expression  
781 levels of *CP204L* and *B646L* mRNA from ASFV after pretreatment, (B) cotreatment and (C)

782 posttreatment with the inhibitors were detected by real-time PCR. Data were normalized to  
783 data from the DMSO-treated samples. PAMs in 12-well plates were pretreated, cotreated or  
784 posttreated with individual inhibitors or DMSO in relation to ASFV (MOI =0.1) infection.  
785 The samples were collected at 24 h postinfection under pre- and cotreatment conditions with  
786 the inhibitors. For the posttreatment samples, the cells were first infected with ASFV for 4 h,  
787 followed by inhibitor treatment for 16 h, after which the samples were collected. The  
788 concentration of the BET/BRD4 inhibitors was 5  $\mu$ M. Error bars show the SD of replicates  
789 qPCR experiments. All experiments were independently conducted at least 3 times. Statistical  
790 significance is denoted by \* $P < 0.05$ , \*\* $P < 0.01$ , \*\*\* $P < 0.001$ , \*\*\*\* $P < 0.0001$ .

791 **Figure 2: Structures of inhibitors and  $CC_{50}$  values.** (A) The structures of ARV-825,  
792 ZL0580, I-BET-762 and PLX51107. (B) The  $CC_{50}$  values of ARV-825, ZL0580, I-BET-762  
793 and PLX51107 against PAMs were calculated.

794 **Figure 3: Time-dependent effect of 4 inhibitors on PAMs.** The four inhibitors act  
795 throughout the whole ASFV infection cycle to decrease ASFV RNA levels. PAMs were  
796 treated with 1  $\mu$ M ARV-825, 10  $\mu$ M ZL0580, 10  $\mu$ M I-BET-762 and 5  $\mu$ M PLX51107 for 16  
797 h prior to ASFV infection (MOI =0.1). ASFV *B646L* mRNA levels at 4 h, 12, 24 h and 48 h  
798 postinfection were detected and analyzed by RT-qPCR. Data were normalized to data from  
799 DMSO-treated samples. Statistical significance is denoted by \* $P < 0.05$ , \*\* $P < 0.01$ , \*\*\* $P <$   
800 0.001.

801 **Figure 4: Dose-dependent effects of ARV-825, I-BET-762, PLX51107 and ZL0580 on**  
802 **ASFV replication.** (A) ASFV yield in PAMs decreased significantly in a dose-dependent  
803 manner with 4 inhibitor pretreatment. (B) ASFV *CP204L* and *B646L* mRNA levels were  
804 analyzed by RT qPCR. (C) The expression of p72 in the presence of 4 inhibitors at several  
805 concentrations was evaluated by WB analysis. PAMs in 12-well plates were treated with  
806 individual inhibitors or DMSO for 16 h prior to ASFV infection (MOI =0.1). The samples  
807 were collected at 24 h postinfection. Data were normalized to data from DMSO-treated  
808 samples. Error bars show the SD of replicate qPCR experiments. All experiments were  
809 independently conducted at least 3 times. Statistical significance is denoted by \* $P < 0.05$ , \*\* $P$   
810  $< 0.01$ , \*\*\* $P < 0.001$ .

811 **Figure 5: BRD4 inhibitors attenuate viral infection.** (A) Viral attachment was assessed  
812 with fluorescence analysis in PAM cells treated with inhibitors and incubated with R18  
813 labeled ASFV (MOI = 100). (B) Viral attachment was assessed with immunoblotting analysis  
814 against ASFV CD2v in PAM cells treated with inhibitors and incubated with ASFV (MOI =  
815 10), GAPDH served as a loading control. (C) Viral internalization was assessed with

816 fluorescence analysis in PAM cells treated with inhibitors and incubated with R18-labeled  
817 ASFV (MOI = 100). (D) Viral desencapsidation was assessed with fluorescence analysis in  
818 PAM cells treated with inhibitors and incubated with EdU-labeled ASFV (MOI = 100). (E)  
819 Viral factories were assessed with fluorescence analysis in PAM cells treated with inhibitors  
820 and incubated with EdU-labeled ASFV (MOI = 100). PAMs were seeded in 2-cm laser  
821 confocal dishes and pretreated with ARV-825 (0.5  $\mu$ M) or DMSO at 37°C for 4h, and then  
822 removed the compounds. The PAMs were infected with ASFV and continued cultured at  
823 appropriate time points before collection.

824

825 **Figure 6: Evaluation of the inhibitory activity of ARV-825, I-BET-762, PLX51107 and**  
826 **ZL0580 against ASFV protein synthesis.** (A) The expression of p30 and p72 in the presence  
827 of the 4 inhibitors ARV-825-1  $\mu$ M, I-BET-762-10  $\mu$ M, PLX51107-5  $\mu$ M and ZL0580-10  $\mu$ M  
828 was evaluated by WB analysis, (B) confocal microscopy and (C) flow cytometry. PAMs in  
829 6-well plates were treated with inhibitors or DMSO 16 h prior to ASFV infection (MOI =1).  
830 The samples were collected at 24 h postinfection.

831 **Figure 7: Effect of inhibitors on the putative subunits of ASFV RNA polymerase.** (A)  
832 The expression of ASFV RNA polymerase subunits was significantly decreased at the RNA  
833 level and (B) protein level with inhibitor treatment. PAMs in 12-well plates were treated with  
834 ZL0580 (10  $\mu$ M), I-BET-762 (10  $\mu$ M), PLX51107 (5  $\mu$ M), ARV-825 (1  $\mu$ M) or DMSO for 16  
835 h prior to ASFV infection (MOI =0.1), and the samples were collected at 24 h postinfection.  
836 The *NP1450L*, *EP1242L*, *H359L*, *D205R*, *C147L*, *D339L*, *CP80R*, *C315R* and *I243L* genes of  
837 ASFV were analyzed by qRT-PCR. The pC315R and pH359L proteins of ASFV were  
838 analyzed by WB analysis. Error bars show the SD of replicate qPCR experiments. All  
839 experiments were independently conducted at least 3 times. Statistical significance is denoted  
840 by \* $P < 0.05$ , \*\* $P < 0.01$ , \*\*\* $P < 0.001$ .

841 **Figure 8: Interaction of 4 inhibitors with BRD4.** Docking analysis of BET-762, PLX51107,  
842 ARV-825 and ZL0580 binding to BD1 and BD2 domains of BRD4 was performed with  
843 Schrödinger Small-Molecule Drug Discovery Suite.

**A**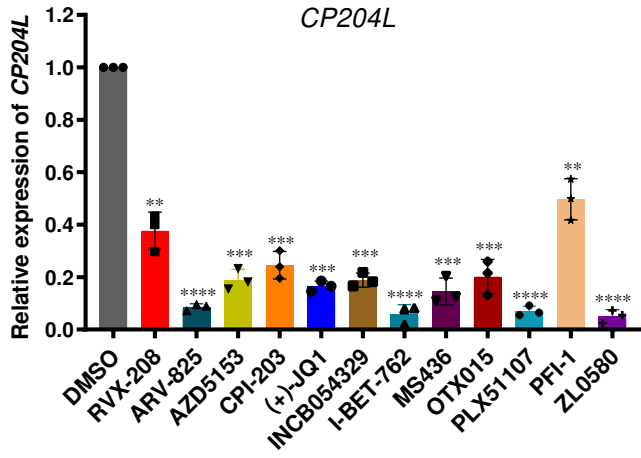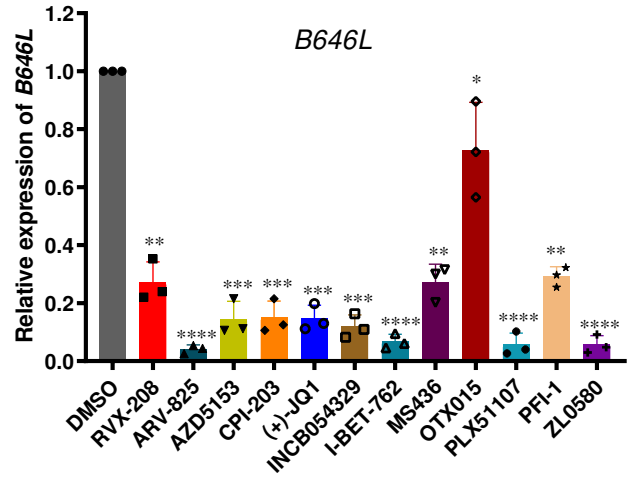**B**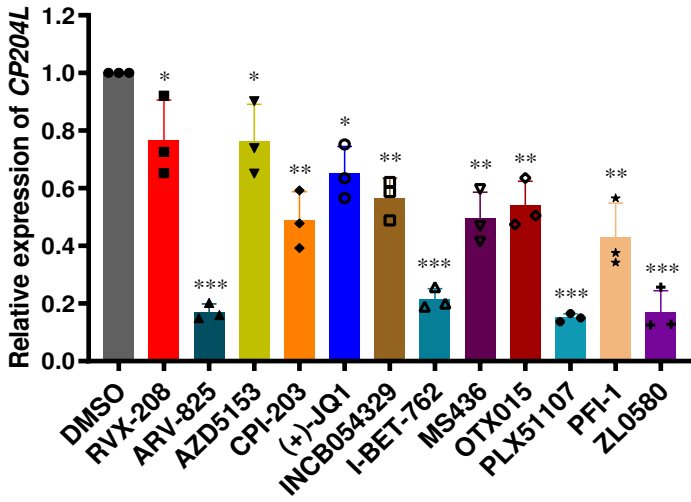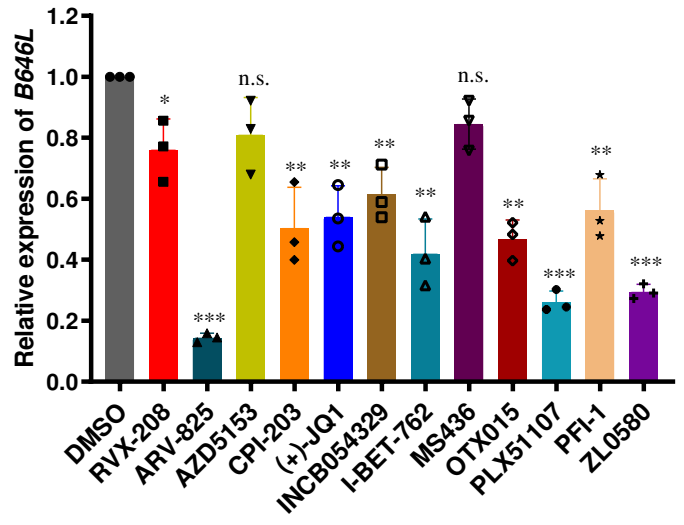**C**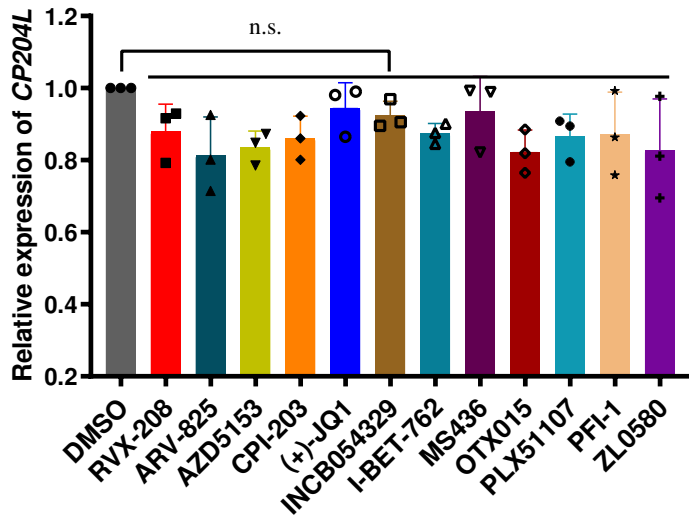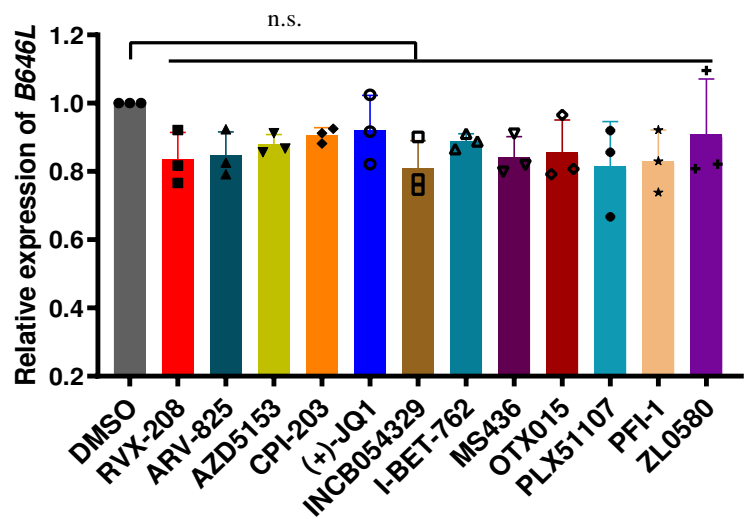

**A**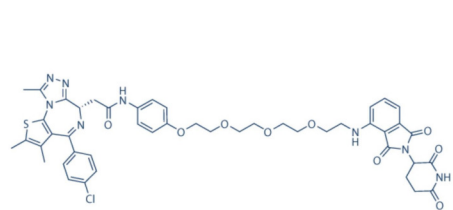**ARV-825**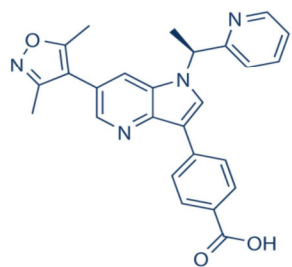**PLX51107**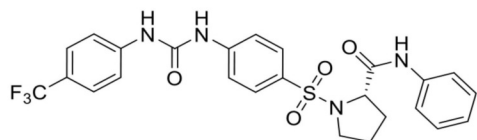**ZL0580**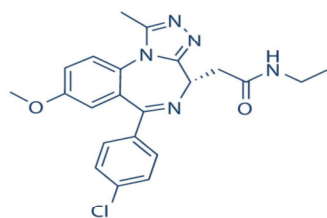**I-BET-762****B**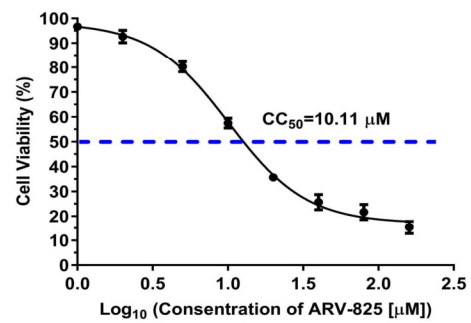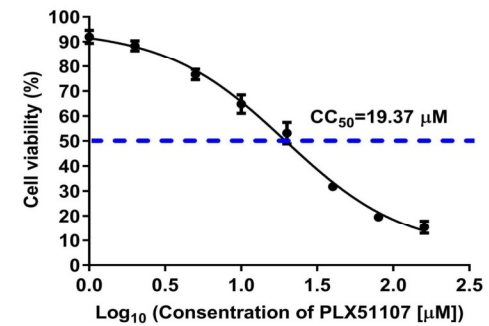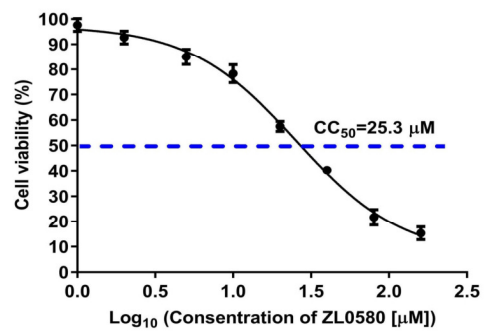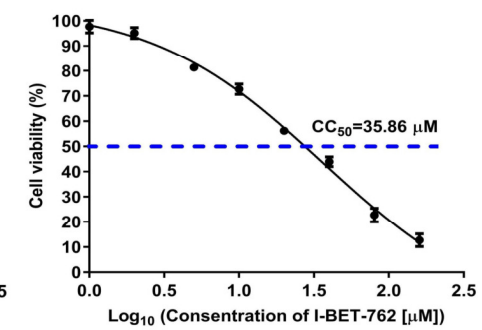

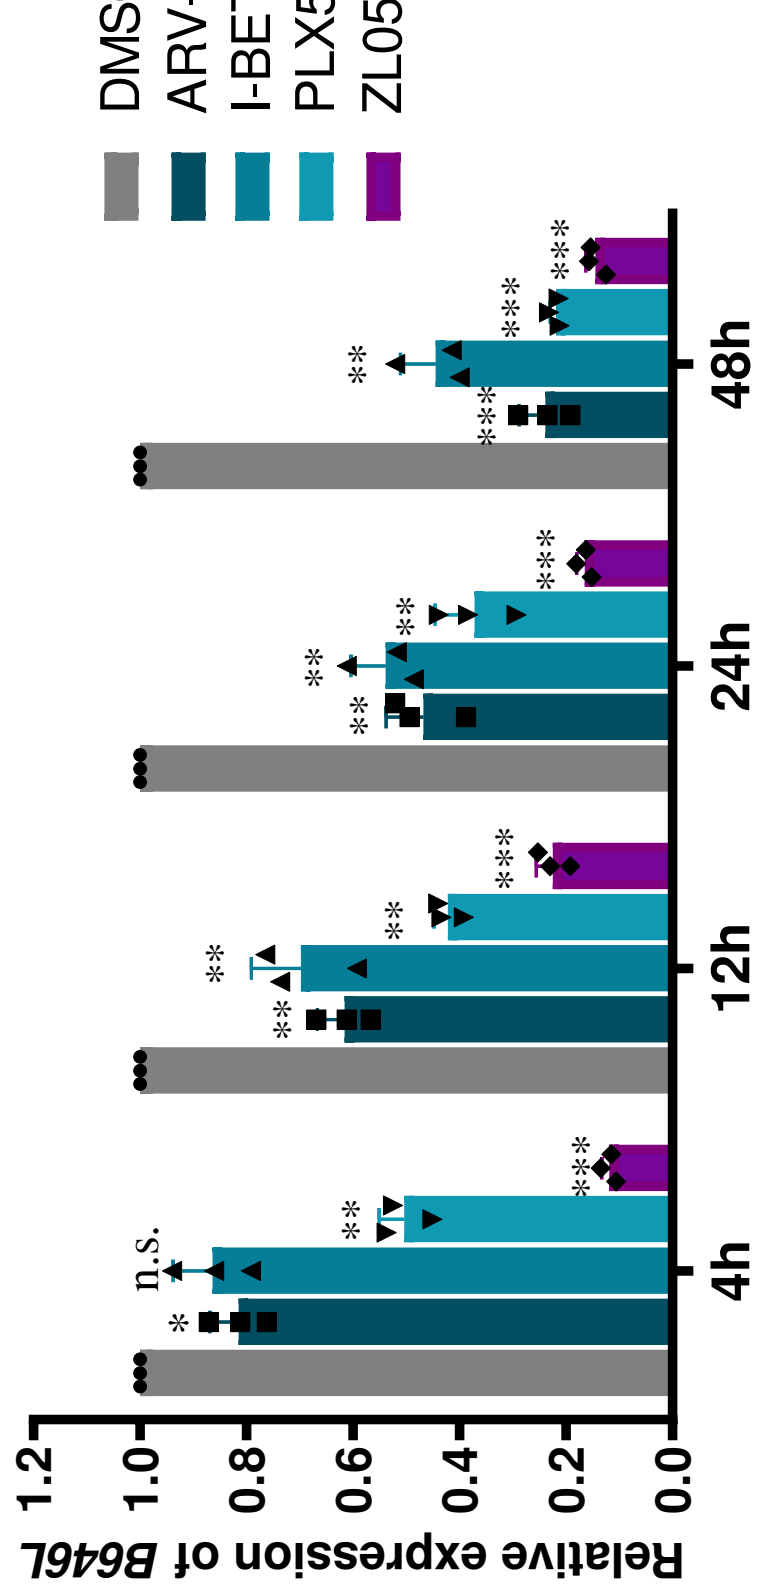



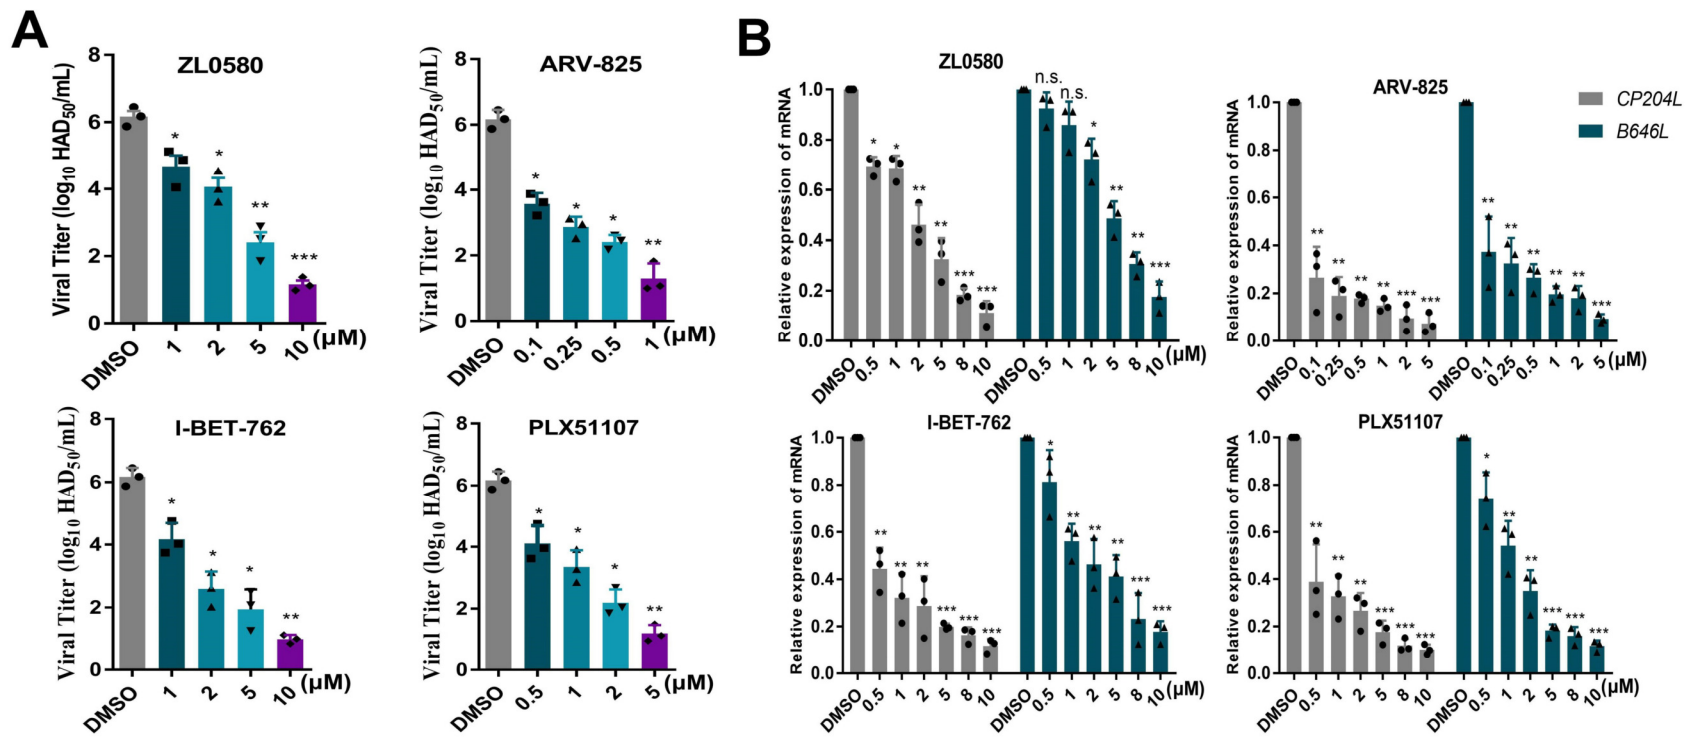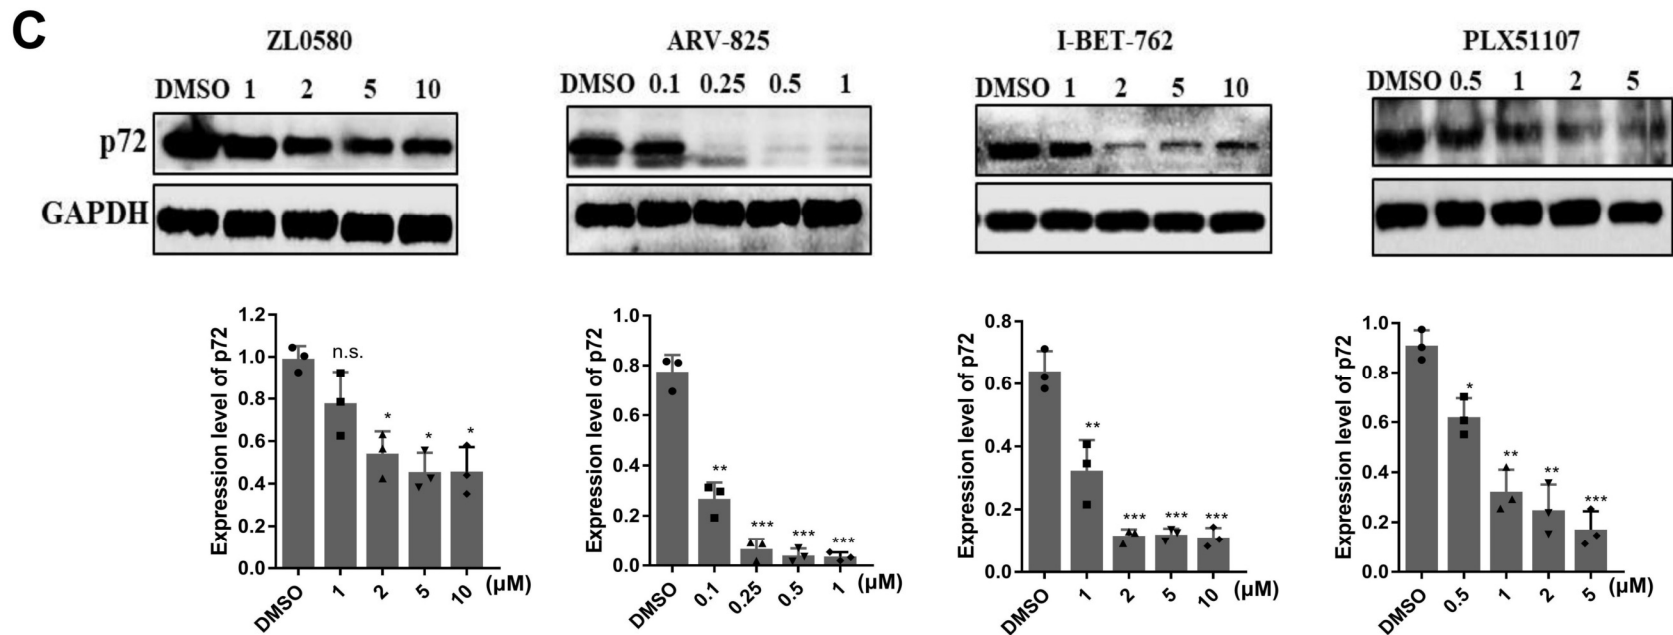

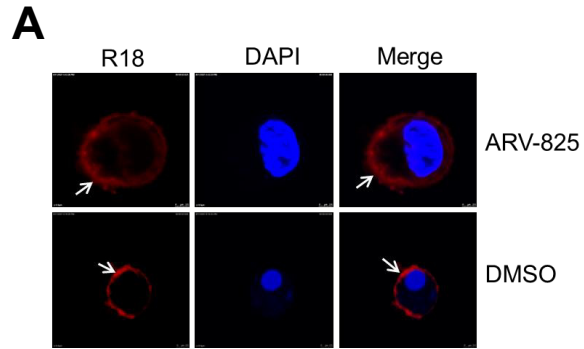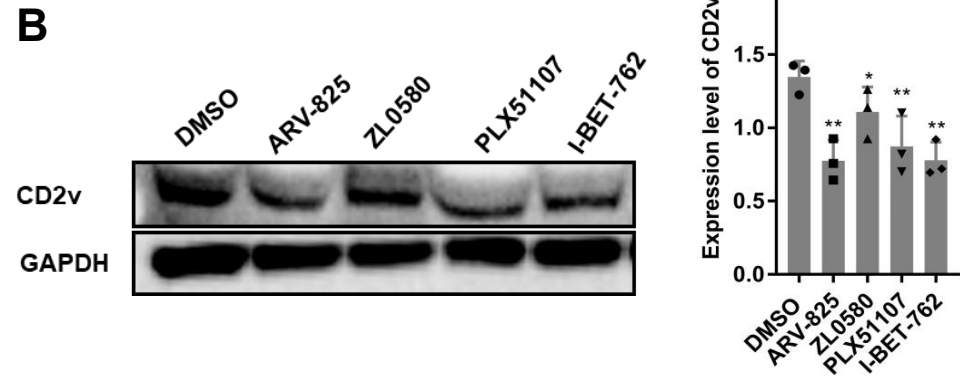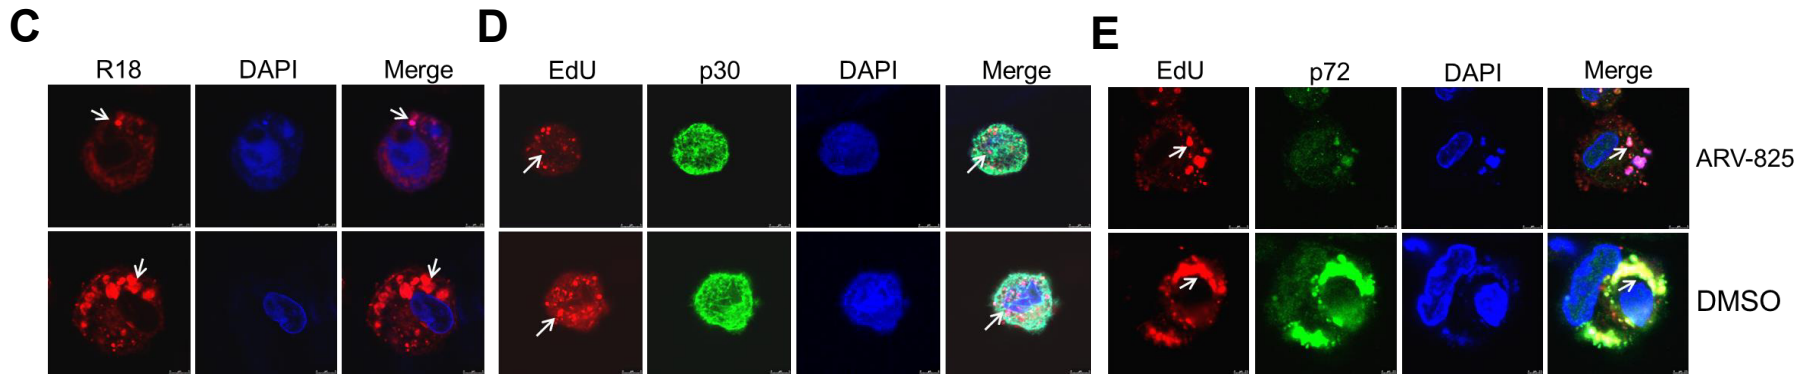

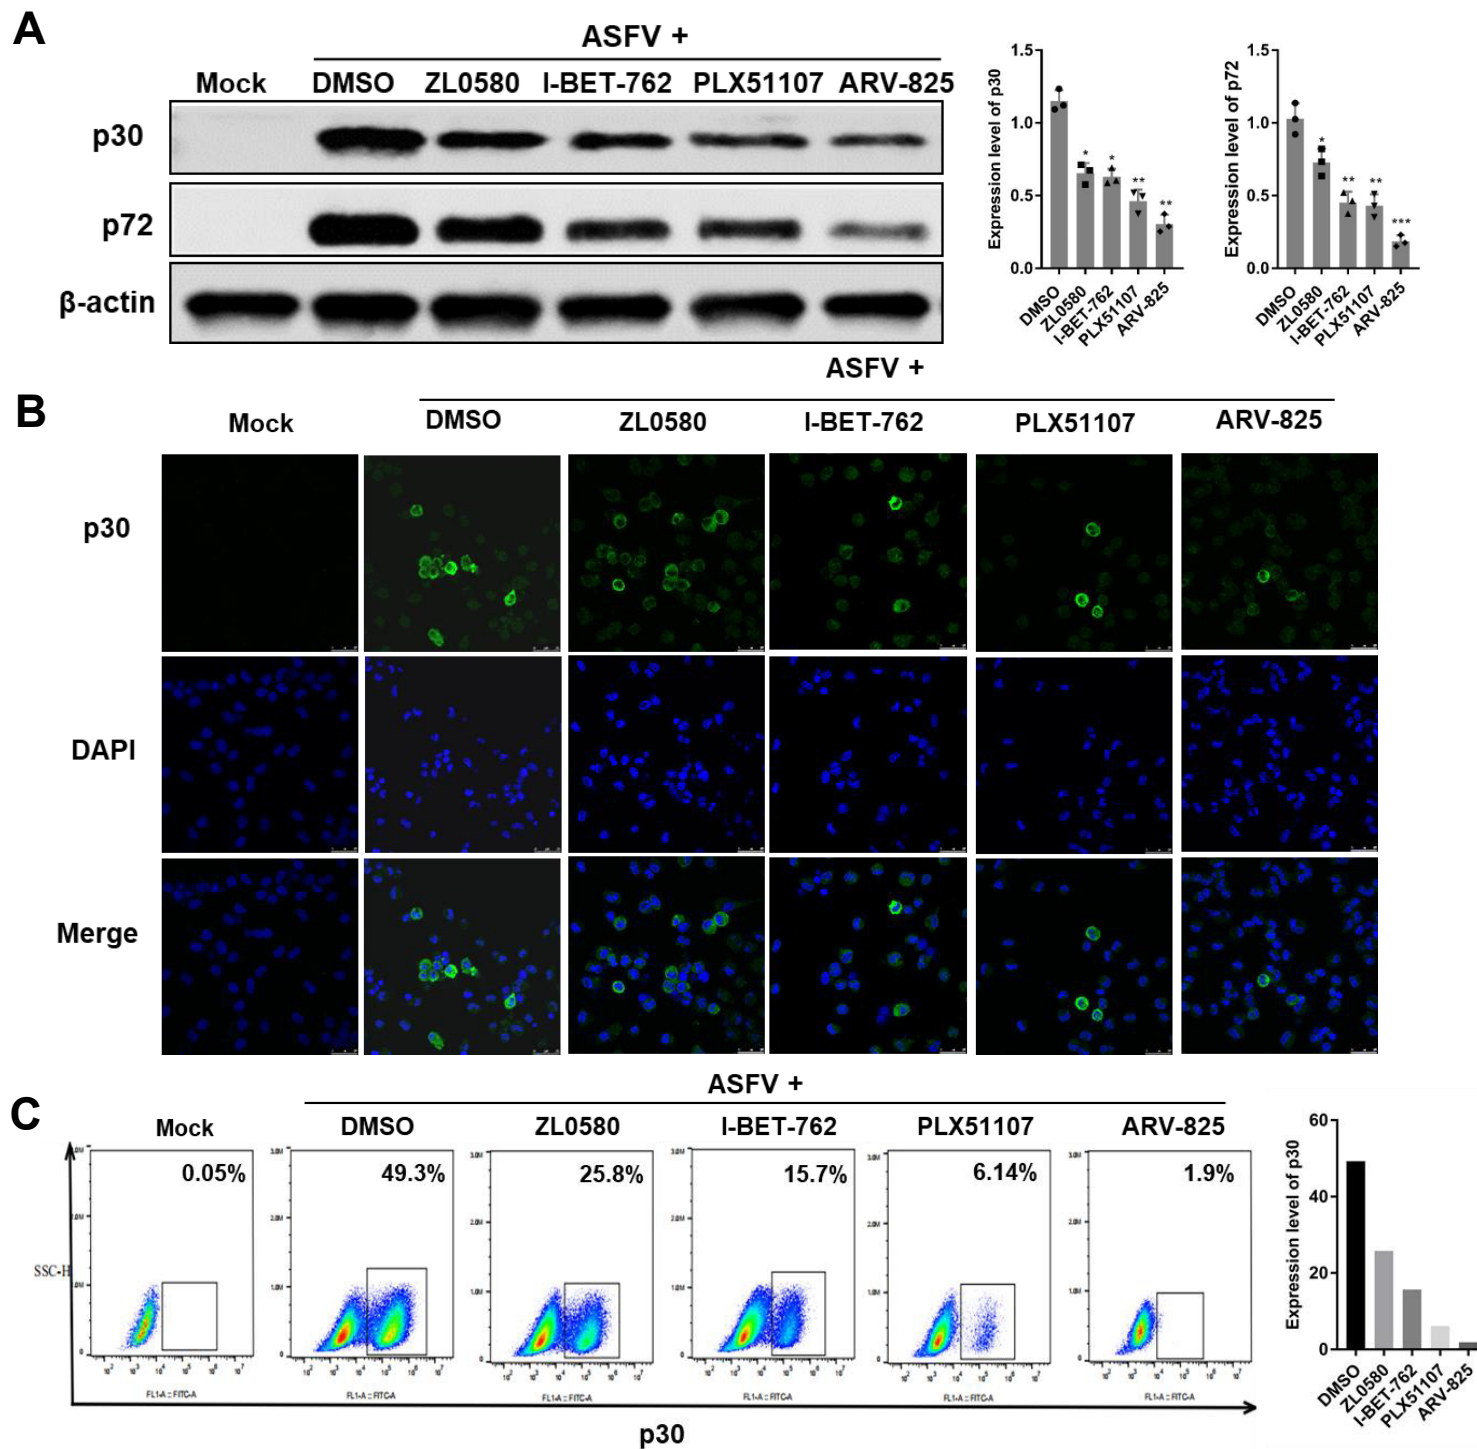

**A**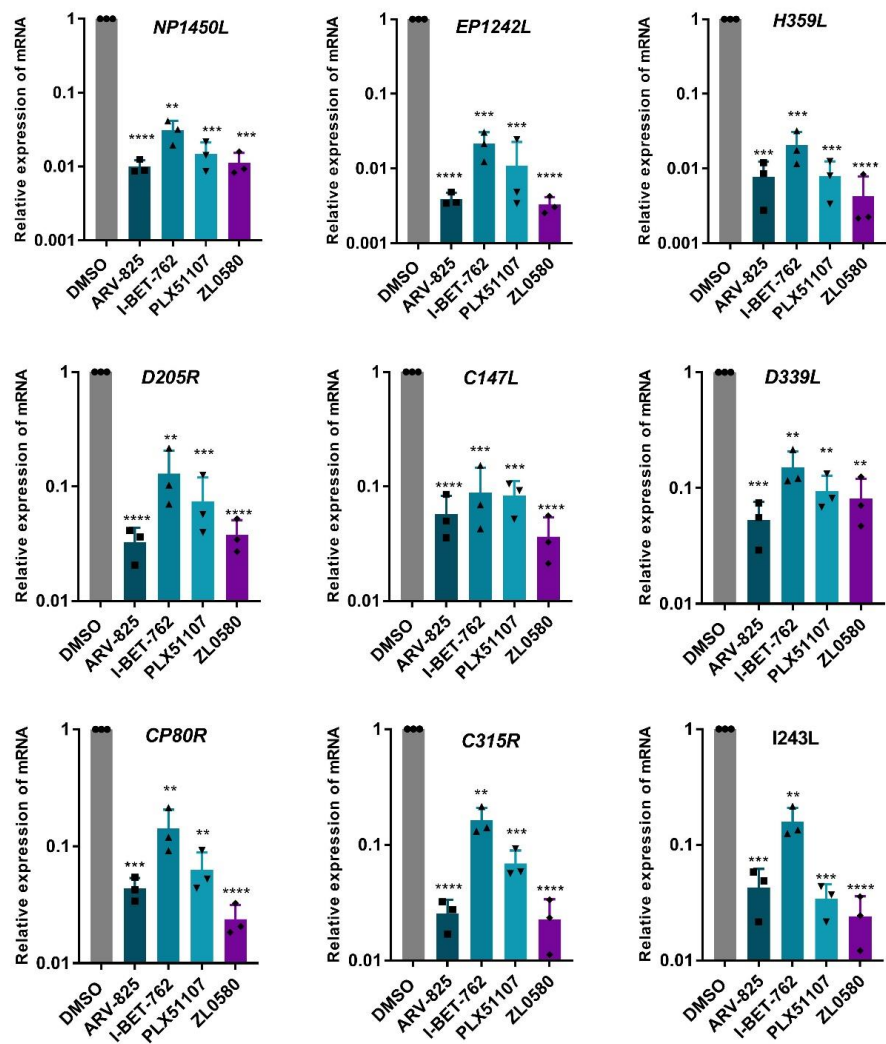**B**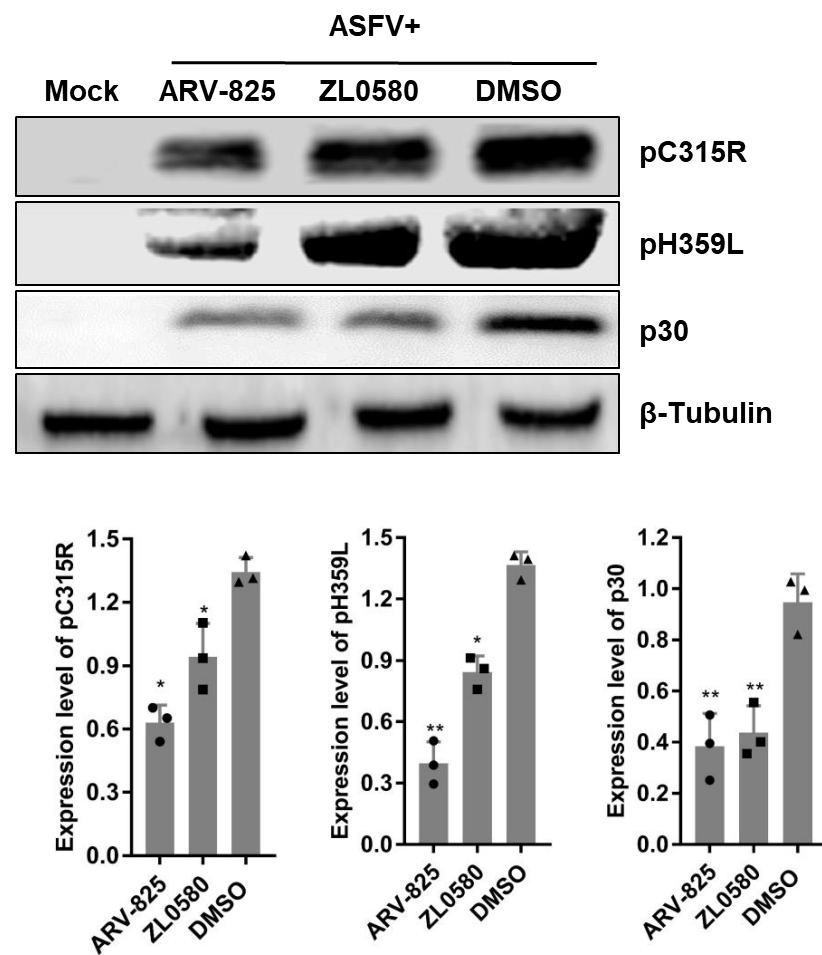

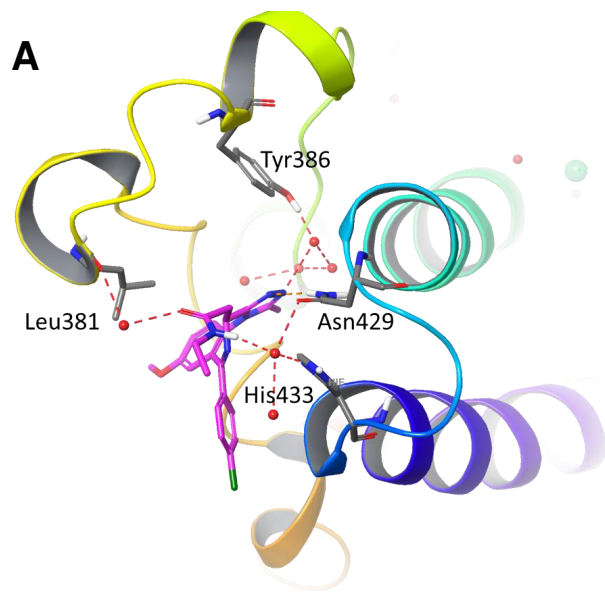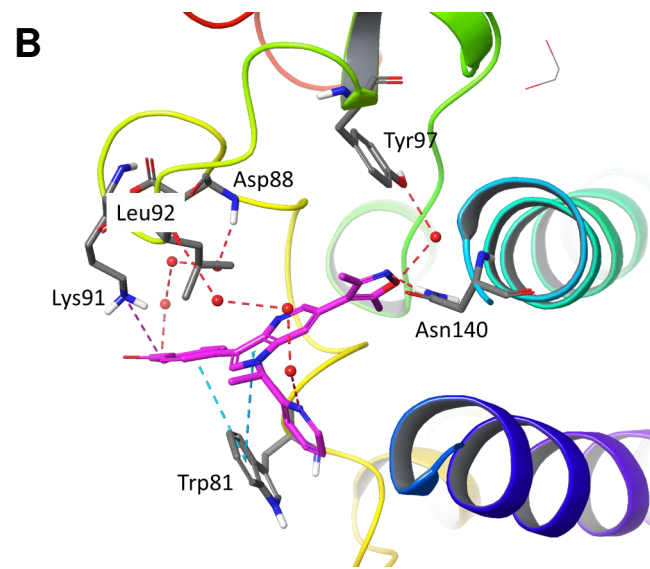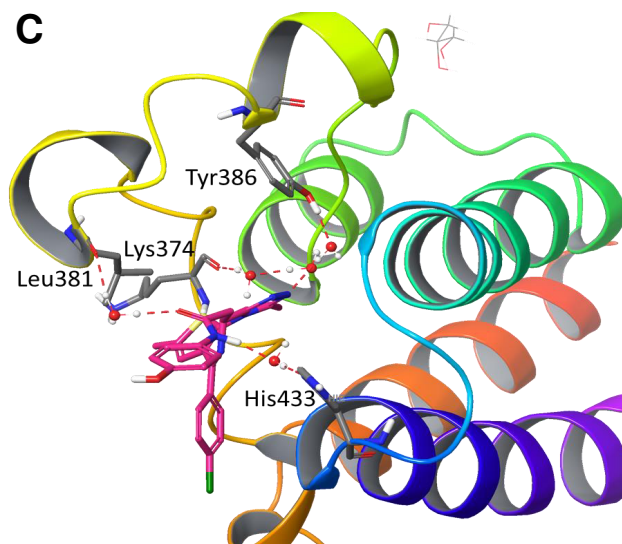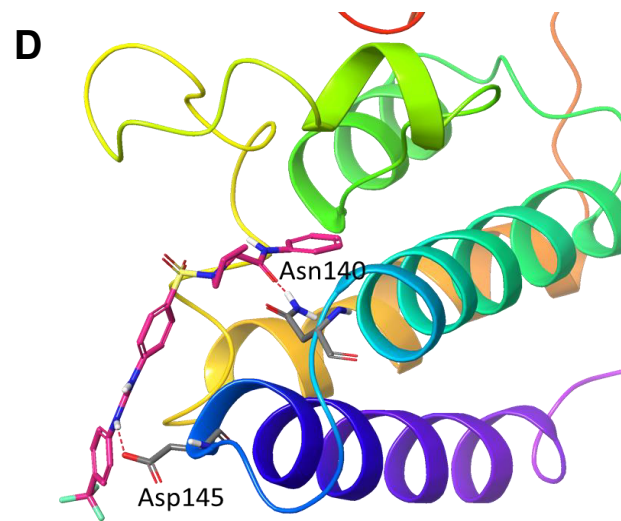

**Table 1**

BET/BRD4 chemical inhibitors used in this study.

| Inhibitors             | Functions                                                                                                                                                                                     | References |
|------------------------|-----------------------------------------------------------------------------------------------------------------------------------------------------------------------------------------------|------------|
| Apabetalone (RVX-208)  | The effective BET bromodomain inhibitor, act on BD2.                                                                                                                                          | (41)       |
| ARV-825                | Recruit BRD4 to E3 ubiquitin ligase cereblon to induce rapid, effective and continuous degradation of BRD4.                                                                                   | (38)       |
| AZD5153                | BET/BRD4 bromodomain BD2 inhibitor, inhibit the target gene expression of nuclear receptor binding SET domain protein 3 (NSD3).                                                               | (42)       |
| CPI-203                | Potent BET bromodomain inhibitor.                                                                                                                                                             | (43)       |
| Molibresib (I-BET-762) | A highly selective inhibitor of BET family.                                                                                                                                                   | (44)       |
| INCB-054329            | BET family bromodomain inhibitor.                                                                                                                                                             | (45)       |
| (+)-JQ1                | BET bromodomain inhibitor, (+)-JQ1 inhibits cell proliferation by inducing autophagy; (+)-JQ1 can inhibit the target gene expression of nuclear receptor binding SET domain protein 3 (NSD3). | (46)       |
| MS436                  | BET bromodomain inhibitor.                                                                                                                                                                    | (47)       |
| Birabresib (OTX015)    | Specifically binds to BRD2/3/4, inhibit the target gene expression of nuclear receptor binding SET domain protein 3 (NSD3).                                                                   | (48)       |
| PLX51107               | A novel BET inhibitor. Among non-BET proteins, PLX51107 only has a significant interaction with the bromine region of CBP and EP300 (p300).                                                   | (49)       |
| PFI-1 (PF-6405761)     | A highly selective BET inhibitor that acts on BRD4 and BRD2.                                                                                                                                  | (50)       |
| ZL0580                 | ZL0580 is selectively bound to the BRD4 BD1 domain that induced epigenetic suppression of HIV via BRD4.                                                                                       | (16)       |

**Table 2**

List of primers and probes used in this study.

| Targets        | Sequence (5'-3')                                                                            |
|----------------|---------------------------------------------------------------------------------------------|
| <i>CP204L</i>  | F: GAGGAGACGGAATCCTCAGC<br>R: GCAAGCATATACAGCTTGGAGT<br>FAM--ACCTCCGATGAGGGCTCTTGCT--TAMRA  |
| <i>B646L</i>   | F: CTGCTCATGGTATCAATCTTATCGA<br>R: GATACCACAAGATCRGCCGT<br>FAM-CCAGGAGCGAGATCCCGCCA-TAMRA   |
| <i>NP1450L</i> | F: GGCTGGAGGTAGGAGACATC<br>R: CCTATGCTGCTTCGTTTCGAG<br>FAM-CGTCACTGGCGACGTCGCGT-TAMRA       |
| <i>EP1242L</i> | F: GAAACCACGGTTGGTCTAGC<br>R: TGAAGATGGCCGCATCAAAG<br>FAM-CAACGGCCAGACCGGCGAGT-TAMRA        |
| <i>H359L</i>   | F: AGGATTCCACGGACCTGTTT<br>R: TTTAAGCTTAGGGCCTGCCA<br>FAM-CCGCAGAGCAAATACCAGTGTCTCGT-TAMRA  |
| <i>D205R</i>   | F: ATCCCTACCACCTGTTCTGC<br>R: TGACGCGCTAATTTGCATGA<br>FAM-ACTCCTGCGCCTCCTCCTGAGT-TAMRA      |
| <i>CP80R</i>   | F: TATGGAACCTACGCGGCAA<br>R: AATGAGTGCACACAACACACC<br>FAM-TTGCGGCAATGTTCCGCCCA-TAMRA        |
| <i>C315R</i>   | F: GGATCTTCTGCGCTCCCTAT<br>R: CGCCGATGTTCTTCTCATCC<br>FAM-ACAAATCCACCAAGAAGTGCAGGAGGA-TAMRA |
| <i>D339L</i>   | F: AATATGGAAAGGGCCAAGG<br>R: AACCTAGGCTGCTGTCTT<br>FAM-TGTCGCGGCTTAAGCCTTGCA-TAMRA          |
| <i>C147L</i>   | F: TCATGGATGACCTCGTGGAG<br>R: ACGATCTCGTCCTTGTCCTC<br>FAM-ACTCCTCCTCACTGTCGACGAGGT-TAMRA    |
| <i>I243L</i>   | F: CGTGTGGGACGATCAATCA<br>R: ACGTCATGCTACCAATTGCC<br>FAM-TCACCAACAACAGGATAACGATGCCCT-TAMRA  |
| <i>GAPDH</i>   | F: TGGAAAGGCCATCACCATCT<br>R: ATGGTCGTGAAGACACCAGT<br>FAM-CCAGGAGCGAGATCCCGCCA-TAMRA        |
